# Hippocampal sharp wave-ripples and the associated sequence replay emerge from structured synaptic interactions in a network model of area CA3

ANDRÁS ECKER<sup>1,2\*</sup>, BENCE BAGI<sup>1,2,3</sup>, ESZTER VÉRTES<sup>1,2,4</sup>, ORSOLYA STEINBACH-NÉMETH<sup>1,2</sup>, MÁRIA R. KARLÓCAI<sup>1</sup>, ORSOLYA I. PAPP<sup>1</sup>, ISTVÁN MIKLÓS<sup>5,6</sup>, NORBERT HÁJOS<sup>1</sup>, TAMÁS F. FREUND<sup>1,2</sup>, ATTILA I. GULYÁS<sup>1</sup>, AND SZABOLCS KÁLI<sup>1,2\*</sup>

<sup>1</sup>*Institute of Experimental Medicine, Eötvös Loránd Research Network, Budapest, Hungary*

<sup>2</sup>*Faculty of Information Technology and Bionics, Pázmány Péter Catholic University, Budapest, Hungary*

<sup>3</sup>*Department of Bioengineering, Imperial College London, United Kingdom*

<sup>4</sup>*Gatsby Computational Neuroscience Unit, University College London, United Kingdom*

<sup>5</sup>*Alfréd Rényi Institute of Mathematics, Eötvös Loránd Research Network, Budapest, Hungary*

<sup>6</sup>*Institute for Computer Science and Control, Eötvös Loránd Research Network, Budapest, Hungary*

\* *Correspondence: (current address:) andras.ecker@epfl.ch (A.E.), kali@koki.hu (S.K., Lead Contact)*

## 1 Summary

2 Hippocampal place cells are activated sequentially as an animal explores its environment.  
3 These activity sequences are internally recreated (“replayed”), either in the same or re-  
4 versed order, during bursts of activity (sharp wave-ripples; SWRs) that occur in sleep and  
5 awake rest. SWR-associated replay is thought to be critical for the creation and mainte-  
6 nance of long-term memory. We sought to identify the cellular and network mechanisms  
7 of SWRs and replay by constructing and simulating a data-driven model of area CA3 of  
8 the hippocampus. Our results show that the structure of recurrent excitatory interactions  
9 established during learning not only determines the content of replay, but is essential for  
10 the generation of the SWRs as well. We find that bidirectional replay requires the inter-  
11 play of the experimentally confirmed, temporally symmetric plasticity rule, and cellular  
12 adaptation. Our model provides a unifying framework for diverse phenomena involving  
13 hippocampal plasticity, representations, and dynamics.

14  
15 **Keywords:** hippocampus, sequence replay, sharp wave, ripple oscillation, spike timing-  
16 dependent plasticity, computational modeling

## 17 1 Introduction

18 The hippocampal region plays a pivotal role in spatial and episodic memory (O’Keefe and  
19 Nadel, 1978; Morris et al., 1982). The different stages of memory processing (Marr, 1971;  
20 Buzsáki, 1989) are associated with distinct brain states, and are characterized by distinct  
21 oscillatory patterns of the hippocampal local field potential (LFP) (Buzsáki et al., 1983;  
22 Colgin, 2016). When rodents explore their environment, place cells of the hippocam-  
23 pus are activated in a sequence that corresponds to the order in which the animal visits  
24 their preferred spatial locations (place fields) (O’Keefe and Dostrovsky, 1971). The same  
25 sequences of firing activity can also be identified, on a faster time scale, during indi-  
26 vidual cycles of the 4-10 Hz theta oscillation that dominates the hippocampal LFP in  
27 this state (O’Keefe and Recce, 1993; Dragoi and Buzsáki, 2006; Foster and Wilson, 2007).  
28 These compressed sequences are thought to be optimal for learning via activity-dependent  
29 synaptic plasticity (Jensen and Lisman, 2005; Foster and Wilson, 2007).

30 Other behavioral states such as slow-wave sleep and quiet wakefulness are characterized  
31 by the repetitive but irregular occurrence of bursts of activity in the hippocampus, marked  
32 by the appearance of sharp waves (Buzsáki et al., 1983; Wilson and McNaughton, 1994)  
33 and associated high-frequency (ripple) oscillations (O’Keefe and Nadel, 1978; Buzsáki  
34 et al., 1992) in the LFP. Disruption of SWRs was shown to impair long-term memory  
35 (Girardeau et al., 2009; Ego-Stengel and Wilson, 2010; Jadhav et al., 2012; Oliva et al.,  
36 2020). The activity sequences observed during exploration are also recapitulated during  
37 SWRs (Nádasdy et al., 1999; Kudrimoti et al., 1999; Lee and Wilson, 2002), in the absence  
38 of any apparent external driver, and this “replay” can happen either in the same or in a  
39 reversed order relative to the original behaviorally driven sequence (Foster and Wilson,  
40 2006; Csicsvari et al., 2007; Diba and Buzsáki, 2007; Davidson et al., 2009; Karlsson and  
41 Frank, 2009; Gupta et al., 2010). More specifically, awake replay is predominantly in the  
42 “forward” direction near choice points during navigation (Diba and Buzsáki, 2007; Pfeiffer  
43 and Foster, 2013), while it is mainly “backward” when the animal encounters a reward  
44 (Diba and Buzsáki, 2007). Consequently, while sleep replay was suggested to be involved  
45 in memory consolidation, forward and reverse replay in awake animals may contribute to  
46 memory recall and reward-based learning, respectively (Carr et al., 2011; Foster, 2017;  
47 Pfeiffer, 2017; Ólafsdóttir et al., 2018). Finally, behavioral tasks with a high memory  
48 demand led to an increase in the duration of SWRs, while artificial prolongation of SWRs  
49 improved memory (Fernández-Ruiz et al., 2019).

50 For several decades, area CA3 of the hippocampus has been proposed to be a critical  
51 site for hippocampal memory operations, mainly due to the presence of an extensive set of  
52 modifiable excitatory recurrent connections that could support the storage and retrieval  
53 of activity patterns and thus implement long-term memory (Marr, 1971; McNaughton  
54 and Morris, 1987; Levy, 1996; Rolls, 1996; Káli and Dayan, 2000). Area CA3 was also  
55 shown to be strongly involved in the generation of SWRs and the associated forward and  
56 reverse replay (Buzsáki, 2015; Davoudi and Foster, 2019).

57 Several modeling studies have addressed either theta oscillogenesis, learning, sequence  
58 replay or ripples; however, a unifying model of how the generation of SWRs and the  
59 associated neuronal activity are shaped by previous experience is currently lacking. In the  
60 present study, we built a simplified, yet data-driven model of the CA3 network, which,  
61 after learning via a symmetric spike-timing-dependent synaptic plasticity rule (Mishra

62 [et al., 2016](#)) during simulated exploration, featured both forward and backward replay  
63 during autonomously generated sharp waves, as well as ripple oscillations generated in  
64 the recurrently connected network of perisomatic interneurons. After validating the model  
65 against several *in vivo* and *in vitro* results ([Buzsáki et al., 1992](#); [Hájos et al., 2013](#); [English  
66 et al., 2014](#); [Schlingloff et al., 2014](#); [Stark et al., 2014](#); [Pfeiffer and Foster, 2015](#); [Gan  
67 et al., 2017](#)), we took advantage of its *in silico* nature that made feasible a variety of  
68 selective manipulations of cellular and network characteristics. Analyzing the changes in  
69 the model’s behavior after these perturbations allowed us to establish the link between  
70 learning from theta sequences and the emergence of SWRs during “off-line” states, to  
71 provide a possible explanation for forward and backward replays, and to disentangle the  
72 mechanisms responsible for sharp waves and ripple oscillations.

## 73 2 Results

74 To gain a mechanistic understanding of the relationship between learning during explo-  
75 ration and SWRs during rest, as well as the generation and role of ripple oscillation,  
76 we built a scaled-down network model of area CA3 of the rodent hippocampus. The  
77 complete network consisted of 8000 excitatory pyramidal cells (PCs) and 150 inhibitory  
78 parvalbumin-containing basket cells (PVBCs), corresponding roughly to the size of the  
79 CA3 area in a 600 micrometer-thick slice of the mouse hippocampus, which is known to  
80 be capable of generating SWRs ([Hájos et al., 2013](#); [Schlingloff et al., 2014](#)). These two cell  
81 types are known to be indispensable to the generation of SWRs ([Racz et al., 2009](#); [Ellen-  
82 der et al., 2010](#); [English et al., 2014](#); [Schlingloff et al., 2014](#); [Stark et al., 2014](#); [Gulyás and  
83 Freund, 2015](#); [Buzsáki, 2015](#); [Gan et al., 2017](#)). All neurons in the network were modeled  
84 as single-compartment, adaptive exponential integrate-and-fire (AdExpIF) models whose  
85 parameters were fit to reproduce *in vitro* voltage traces of the given cell types in response  
86 to a series of step current injections (Methods, Supplementary Figure S2). Connections  
87 of all types (PC-PC, PC-PVBC, PVBC-PC, PVBC-PVBC) were established randomly  
88 using connection type-specific probabilities estimated from anatomical studies.

89 Simulations of the network were run in two phases corresponding to spatial explo-  
90 ration and “off-line” hippocampal states (slow-wave sleep and awake immobility), respec-  
91 tively. During the exploration phase, the spiking activity of PCs was explicitly set to  
92 mimic the firing patterns of a population of place cells during simulated runs on a linear  
93 track, and the recurrent connections between PCs evolved according to an experimentally-  
94 constrained, spike-timing-dependent plasticity (STDP) rule (see below). In the subse-  
95 quent off-line phase, we recorded the spontaneous dynamics of the network in the absence  
96 of structured external input (or plasticity), analyzed the global dynamics (including av-  
97 erage firing rates and oscillations), and looked for the potential appearance of sequential  
98 activity patterns corresponding to the previous activation of place cells during exploration,  
99 often referred to as “replay”. The main features of the model are summarized in Figure 1.

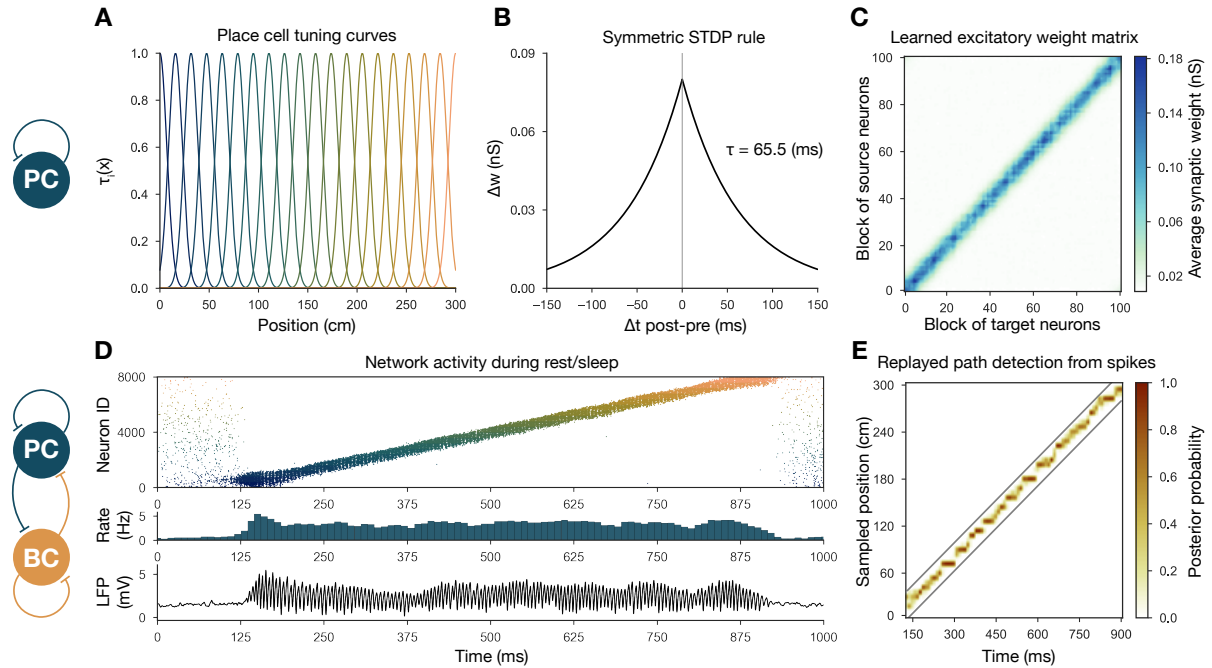

**Figure 1: Overview of learning and the spontaneous generation of SWRs and sequence replay in the model.** (A) Tuning curves (eq. (1)) of exemplar place cells covering the whole 3 m long linear track. (B) Broad, symmetric STDP kernel used in the learning phase. The time constant was fit directly to experimental data from [Mishra et al. \(2016\)](#). (C) Learned excitatory recurrent weight matrix. Neurons are ordered according to the location of their place fields. Actual dimensions are 8000\*8000 (including PCs with no place fields in the environment) but, for better visualization, each pixel shown represents the average of an 80\*80 square. (D) PC raster plot is shown in the top panel, color-coded and ordered as the place fields in (A). PC population rate (middle), and LFP estimate (bottom panel), corresponding to the same time period. (E) Posterior matrix of the decoded positions from spikes within the high activity period shown in (D). Gray lines indicate the edges of the decoded, constant velocity path.

## 100 2.1 Recurrent weights are learned during exploration via a sym- 101 metric STDP rule

102 During exploration, half of the PCs had randomly assigned, overlapping place fields in  
103 the simulated environment, characterized by Gaussian spatial tuning curves, whereas the  
104 others fired at low rates in a spatially non-specific manner (Methods, Figure 1A). During  
105 simulated unidirectional runs along a 3 meter-long linear track, these tuning curves, mod-  
106 ulated by theta oscillation and phase precession, gave rise to generated spike trains similar  
107 to those observed for real place cells under similar conditions (Methods, Supplementary  
108 Figure S1). The simulated spike trains served as inputs for STDP, which was character-  
109 ized by the broad, symmetric kernel observed in pairs of CA3 PCs recorded in hippocampal  
110 slices (Figure 1B) ([Mishra et al., 2016](#)). The anatomical connectivity of PCs was sparse  
111 and random, assuming 10% PC-PC connection probability ([Lisman, 1999](#); [Andersen et al.,  
112 2007](#)), and only these pre-existing connections were allowed to evolve (Methods).

113 The most prominent feature of the learned recurrent excitatory synaptic weight matrix  
114 was its highly organized structure (Figure 1C). Relatively few strong ( $> 1$  nS) synapses  
115 near the diagonal (representing pairs of cells with overlapping place fields) emerged from



116 a background of much weaker connections. Similar symmetric weight structures have  
117 been used in continuous “bump” attractor models of various neural systems such as head  
118 direction cells, place cells, and parametric working memory (Zhang, 1996; Samsonovich  
119 and McNaughton, 1997; Káli and Dayan, 2000; Compte et al., 2000). In these studies, the  
120 weights were typically either imposed or learned using rate-based (not STDP) learning  
121 rules, and led to stationary patterns of activity in the absence of external input. By  
122 contrast, previous spiking neuron models of sequence learning used temporally asymmetric  
123 STDP rules, resulting in a weight structure dominated by feedforward chains (each neuron  
124 giving the strongest input to other neurons which follow it in the spatial sequence), and  
125 sequential activity patterns that follow these chains of strong connections (Jahnke et al.,  
126 2015; Chenkov et al., 2017). In order to reveal the combined effect of learned, essentially  
127 symmetric connections and realistic cell-type-specific neuronal spike responses, we next  
128 explored the spontaneously generated activity patterns in our full network model.

## 129 **2.2 The dynamics of the network model reproduce key features** 130 **of SWRs and replay**

131 The sparse recurrent excitatory weight matrix resulting from the phenomenological explo-  
132 ration (Figure 1C) was used directly in network simulations mimicking resting periods, in  
133 which (with the exception of the simulations shown later in Figure 2C) PCs received only  
134 spatially and temporally unstructured random synaptic input. The maximal conductances  
135 of the other types of connections in the network (the weights of PC-PVBC, PVBC-PC,  
136 and PVBC-PVBC connections as well as the weight of the external random input) were  
137 optimized using an evolutionary algorithm with network-level objectives, which included  
138 physiological PC population firing rates, suppressed gamma oscillation in the PC popu-  
139 lation and strong ripple oscillation in the PVBC population (see Methods for details).

140 Spontaneously generated activity in the network consisted of alternating periods of low  
141 activity (mean PC rates below 1 Hz) and high activity (mean PC rates around 3.5 Hz),  
142 which resembled the recurring appearance of sharp wave events during slow-wave sleep  
143 and quiet wakefulness (Figure 2A). Similar to experimental sharp waves, high-activity  
144 events in the model were accompanied by transient oscillations in the ripple frequency  
145 range (Figure 2B) (Buzsáki, 1986; Buzsáki et al., 1992; Foster and Wilson, 2006; Buzsáki,  
146 2015). We calculated an estimate of the LFP by summing the synaptic inputs of a small,  
147 randomly selected subset of PCs (Mazzoni et al., 2008), and found that ripple oscillations  
148 were reliably present in this signal during the high-activity periods (Figure 1D, Figure  
149 2B).

150 When we plotted the spike times of all PCs with place cells ordered according to the  
151 location of their place fields on the track during the learning phase, it became clear that  
152 place cell sequences were replayed during simulated SWRs, while activity had no obvious  
153 structure in the low-activity periods between SWRs (Figure 2A). Interestingly, replay of  
154 place cell sequences could occur in either the forward or the backward direction relative to  
155 the order of activation in the learning phase (Figure 2A). These qualitative observations  
156 were confirmed by analysing sequence replays with a Bayesian place decoding and path  
157 fitting method, using spatial tuning curves introduced for spike train generation in the  
158 exploration part (Methods, Figure 1E) (Davidson et al., 2009; Karlsson and Frank, 2009;  
159 Ólafsdóttir et al., 2018). Interestingly, our network model also reproduced the broad,

160 long-tailed step size distribution in the sequence of decoded locations during SWRs, as  
161 observed experimentally by Pfeiffer and Foster (2015) (Supplementary Figure S3).

162 It was also possible to “cue” replay, by giving an additional external stimulation to a  
163 small subpopulation ( $n = 100$ ) of PCs which had overlapping place fields in the learned  
164 environment. In this case, sequence replay started at the location corresponding to the  
165 cells which received extra stimulation (Figure 2C). This feature may explain why awake  
166 replay tends to be forward when the animal is planning a trajectory from its current  
167 location, and backward at the goal location.

168 At the level of single cells, we found that both PCs and PVBCs received approxi-  
169 mately balanced excitation and inhibition during SWR events, and inhibitory currents  
170 were modulated at the ripple frequency in these periods (Supplementary Figure S4C).  
171 Excitatory inputs dominated between SWRs, and during the initiation of SWR events.  
172 Only a small minority of PCs fired in individual ripple cycles, while the participation of  
173 PVBCs was much higher (but not complete), resulting in a mean PVBC firing rate of  
174  $\sim 65$  Hz during the SWRs, which is much higher than their baseline rate, but significantly  
175 below the ripple frequency (Supplementary Figure S4A, B). All of these findings were  
176 consistent with experimental results *in vitro* (Hájos et al., 2013; Schlingloff et al., 2014)  
177 and *in vivo* (English et al., 2014; Hulse et al., 2016; Gan et al., 2017). On the other hand,  
178 we note that the single cell firing rate distribution of place cells was close to normal in the  
179 model (Supplementary Figure S4A1), different from the lognormal distribution reported  
180 *in vivo* (Mizuseki and Buzsáki, 2013).

### 181 2.2.1 SWRs and replay are robust when recurrent excitation is varied

182 To show that our network model reproduces the wide range of experimental findings  
183 presented above in a robust manner, we ran a sensitivity analysis of several parameters.  
184 We started by studying the effects of the recurrent excitatory weights, which are the  
185 link between exploratory and resting dynamics. To this end, we ran simulations with  
186 systematically up- and downscaled PC-PC weights, and automatically evaluated various  
187 features of the network dynamics, such as population-averaged firing rates, the presence  
188 of sequence replay, as well as significant peaks in the ripple frequency range in the power  
189 spectra as shown before (Methods, Figure 3). The network with PC-PC weights multiplied  
190 by 0.8 displayed a low-activity, noisy state with severely reduced mean PC firing rate,  
191 no sequence replay, and no clear oscillation (Figure 3A1). At the 0.9 multiplier level  
192 sequence replays started to appear, but were less frequent than in the baseline model  
193 (Figure 3A2). As the PC-PC synaptic weights were scaled up, sequence replays became  
194 faster (completed in a shorter time) and occurred more often (Figure 3A3), a behavior  
195 which was stable and realistic up to the 1.5 multiplier level. Ripple oscillations had higher  
196 power and appeared at lower multiplier levels in the PVBC population than in the PC  
197 population (Supplementary Figure S5), suggesting that they originate from the PVBCs  
198 and propagate to the PCs, in agreement with theories based on experimental findings  
199 (Buzsáki et al., 1992; Ylinen et al., 1995; Racz et al., 2009; Schlingloff et al., 2014; Stark  
200 et al., 2014; Gan et al., 2017).

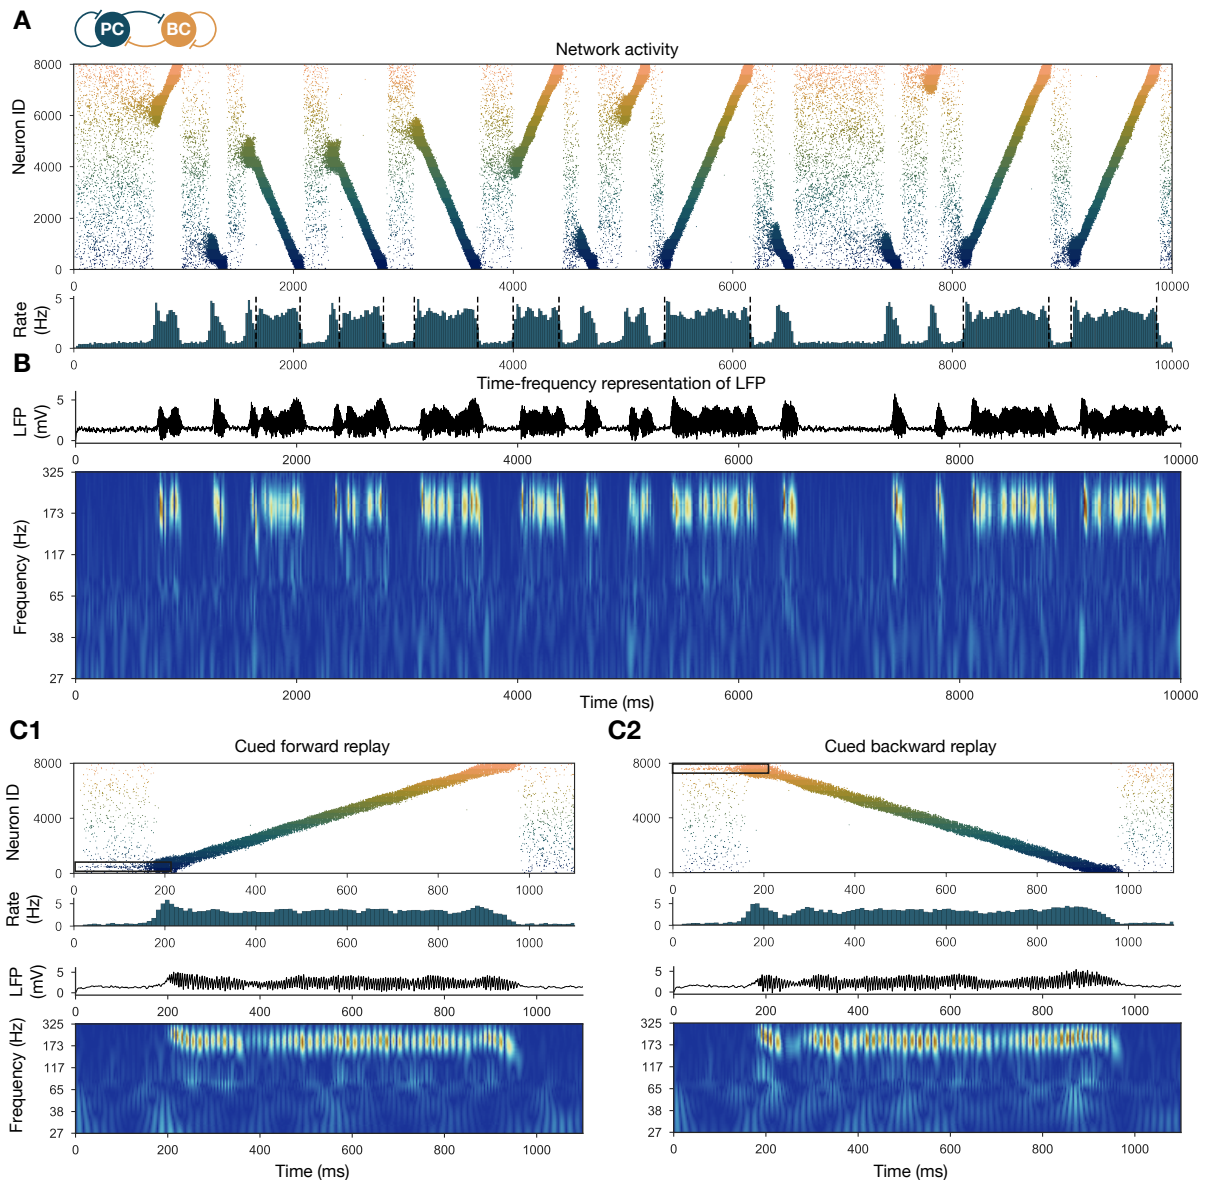

**Figure 2: Forward and backward replay events, accompanied by ripple oscillations, can occur spontaneously but can also be cued.** (A) PC raster plot of a 10-second long simulation, with sequence replays initiating at random time points and positions and propagating either in forward or backward direction on the top panel. PC population firing rate is plotted below. Dashed vertical black lines indicate the periods marked as sustained high activity states (above 2 Hz for at least 260 ms) which are submitted to automated spectral and replay analysis. (B) Estimated LFP in the top panel and its time-frequency representation (wavelet analysis) below. (C) Forward and backward sequence replays resulting from targeted stimulation (using 200 ms long 20 Hz Poisson spike trains) of selected 100 neuron subgroups, indicated by the black rectangles in the raster plots. (C1) Example of cued forward replay. PC raster plot is shown at the top with PC population rate, LFP estimate, and its time-frequency representation (wavelet analysis) below. (C2) Same as (C1), but different neurons are stimulated at the beginning, leading to backward replay.

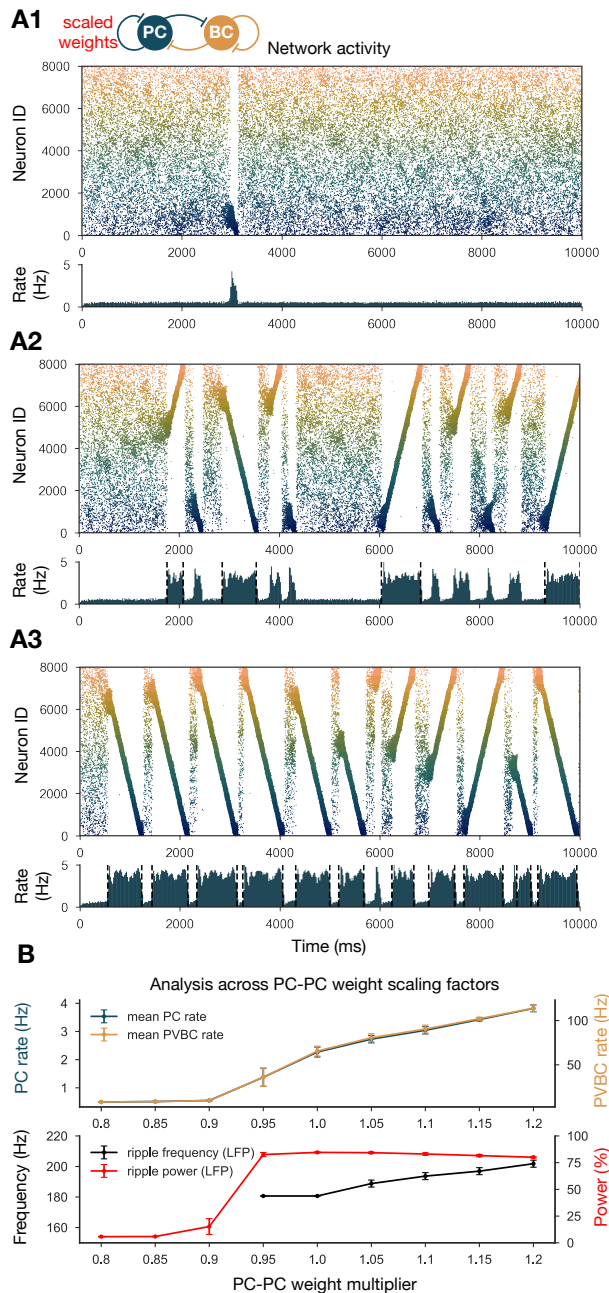

**Figure 3: Sharp waves, ripple oscillations, and replay are robust with respect to scaling the recurrent excitatory weights.** (A) PC raster plots on top and PC population rates at the bottom for E-E scaling factors: 0.9 (A1), 0.95 (A2) and 1.05 (A3). (Scaling factor of 1.0 is equivalent to Figure 2A.) Dashed vertical black lines have the same meaning as in Figure 2A. (B) Analysis of selected indicators of network dynamics across different E-E weight scaling factors (0.8-1.2). Mean PC (blue) and PVBC (gold) population rates are shown on top. The frequency of significant ripple oscillations (black) and the percentage of power in the ripple frequency range (red) in the estimated LFP is shown at the bottom. Errors bars indicate standard deviation and are derived from simulations with 5 different random seeds. See also Supplementary Figure S5.



## 201 **2.2.2 Multiple environments can be learned and replayed**

202 Next we showed that it is possible to store the representations of multiple environments  
203 in the weight matrix, and this change does not fundamentally alter the network dynamics  
204 (Figure 4). In particular, we simulated experience and STDP-based learning in two linear  
205 environments with a different but overlapping random set of place cells (Figure 4A). The  
206 resulting population-level dynamics was quite similar to the one following experience in a  
207 single environment, but, during each SWR event, a place cell sequence from either one or  
208 the other environment was reactivated (Figure 4B, C). Learning two sequences with the  
209 same additive symmetric (non-decreasing) STDP rule led to stronger PC-PC synapses on  
210 average (Figure 4A4), which resulted in a higher overall mean PC rate (Figure 4B, D).  
211 As a consequence, detectable sequence replays and significant ripple oscillations appeared  
212 at lower PC-PC weight multiplier levels (Figure 4D).

## 213 **2.3 Manipulating the model reveals mechanisms of sharp wave-** 214 **ripple generation and sequence replay**

### 215 **2.3.1 Symmetric STDP rule is necessary for bidirectional replay**

216 Our network model, equipped with structured recurrent excitation resulting from learning,  
217 was able to robustly reproduce recurring sharp wave events accompanied by bidirectional  
218 sequence replay and ripple oscillations. Next, we set out to modify this excitatory weight  
219 matrix to gain a more causal understanding of how the learned weight pattern is related  
220 to the emergent spontaneous dynamics of the network.

221 First, in order to gauge the significance of the experimentally determined symmetric  
222 STDP rule, we changed the STDP kernel to the classical asymmetric one that characterizes  
223 many other connections in the nervous system (Figure 5A-C) (Bi and Poo, 1998; Gerstner  
224 et al., 2014). In this case, the learned weight matrix was reminiscent of the feedforward  
225 chains that characterized several of the earlier models of hippocampal replay (Jahnke  
226 et al., 2015; Chenkov et al., 2017; Theodoni et al., 2018). We found that this weight  
227 structure also supported the generation of SWR events and the reactivation of learned  
228 sequences in our model; however, crucially, sequence replays occurred only in the forward  
229 direction (Figure 5D, E). Theodoni et al. (2018) presented a thorough analysis of the  
230 relationship between the shape of the plasticity kernel and the sequence replay in a rate  
231 based model, and thus we shifted our focus towards different modifications.

### 232 **2.3.2 The structure rather than the statistics of recurrent excitatory weights** 233 **is critical for SWRs**

234 Inspired by the observation that many network-level properties, such as single PC firing  
235 rates, burst index, and participation in SWR events, follow a skewed, lognormal distri-  
236 bution *in vivo* (Mizuseki and Buzsáki, 2013), Omura et al. (2015) built a network model  
237 with recurrent excitatory weights following a lognormal distribution. Their network with  
238 unstructured, but lognormally distributed recurrent synaptic strengths reproduced most  
239 of the *in vivo* observations of Mizuseki and Buzsáki (2013); however, no sequence replay or  
240 ripple oscillation was involved. In the network presented here, the distribution of PC-PC  
241 weights is the result of the application of STDP on the generated spike trains and does not



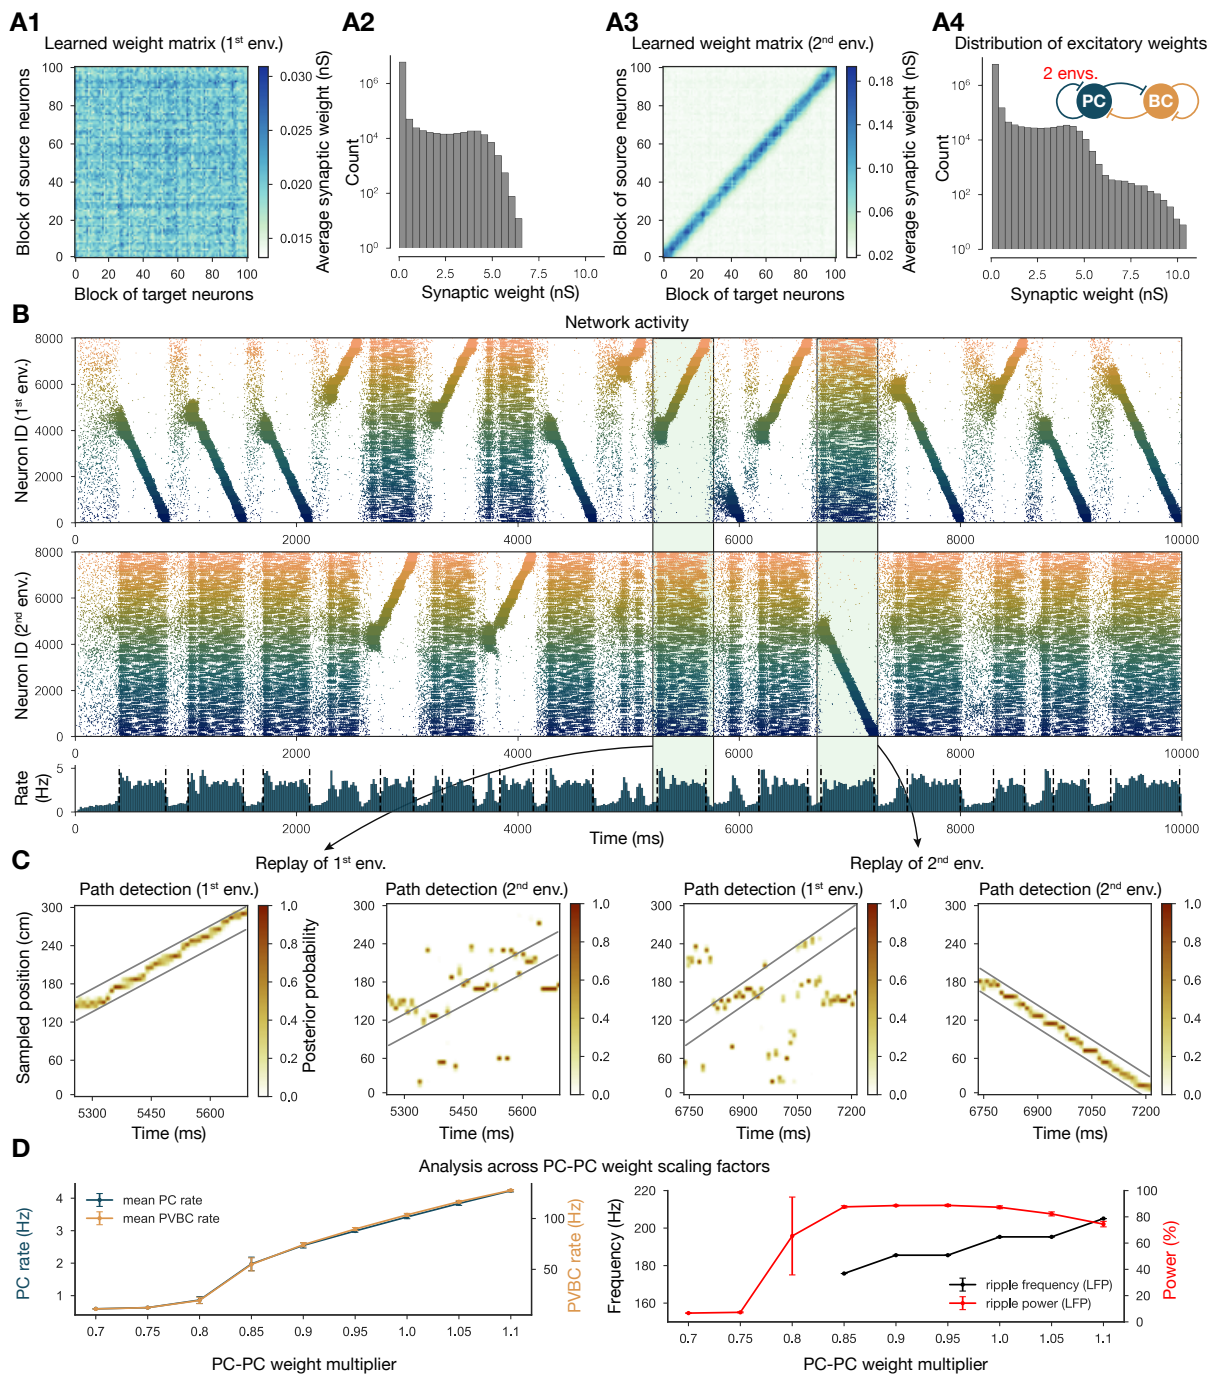

**Figure 4: Two distinct environments can be learned and replayed by the network.** (A) Learned excitatory recurrent weight matrices. (A1) Weights after learning the first environment. Note that the matrix appears random because neurons are arranged according to their place field location in the second environment, which has not been explored at this point. (A3) Weights after learning in the second environment. (A2) and (A4) distribution of non-zero synaptic weights in the learned weight matrices in (A1) and (A2) respectively. (B) PC raster plots: in the top panel neurons are ordered and colored according to the first environment; in the middle panel neurons are ordered and colored according to the second environment; and PC population rate is shown at the bottom (see Figure 2A) from a simulation run with 0.9\* the modified weight matrix shown in (A3).

**Figure 4:** (C) Posterior matrices of decoded positions from spikes (see Figure 1E) within a selected high activity state (8th and 10th from (B)). From left to right: decoding of replay in 1st environment (8th event from (B)) according to the first (significant) and second environment; decoding of replay in second environment (10th event from (B)) according to the first and second (significant) environment. (D) Analysis of selected network dynamics indicators across different E-E weight scaling factors (0.7-1.1) as in Figure 3 (B).

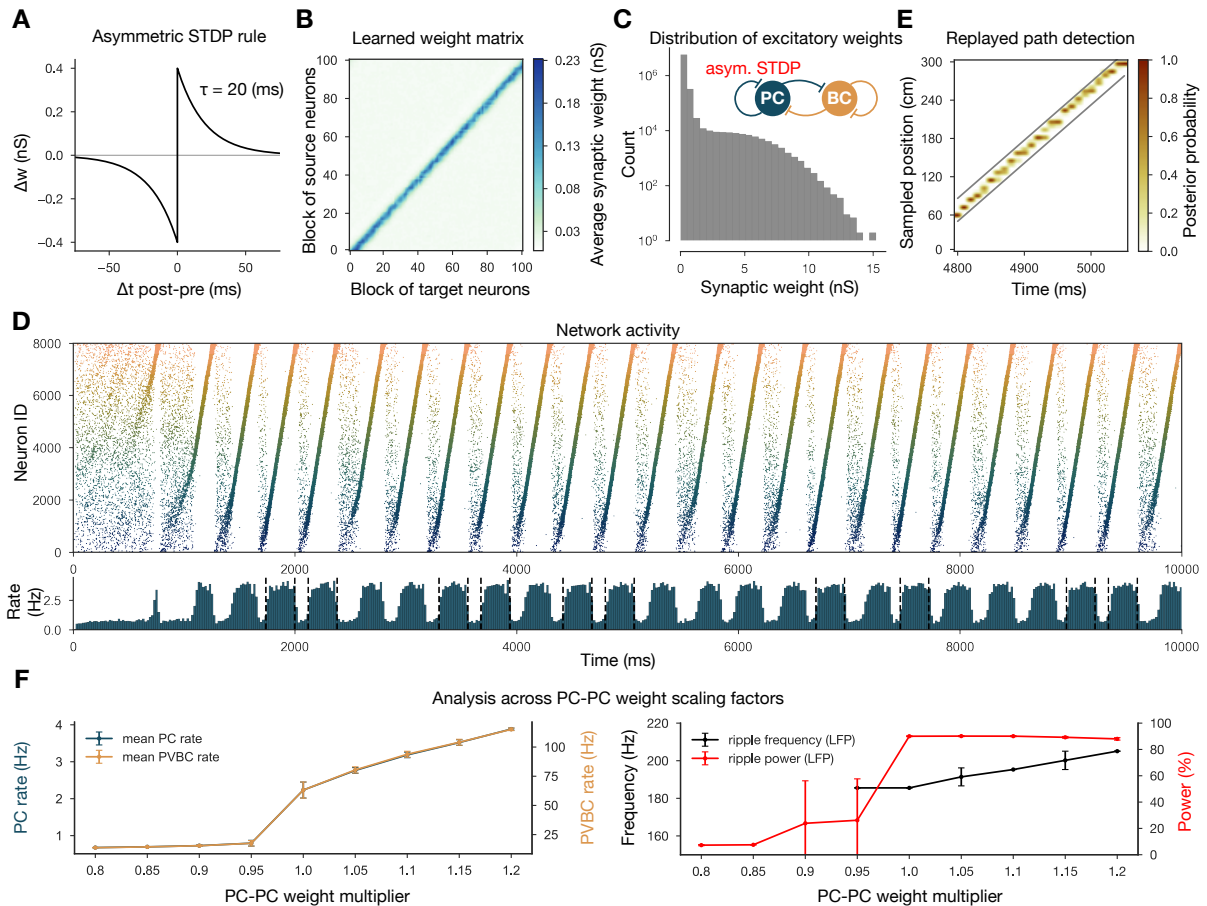

**Figure 5: Learning with an asymmetric STDP rule leads to the absence of backward replay.** (A) Asymmetric STDP kernel used in the learning phase. (B) Learned excitatory recurrent weight matrix. (C) Distribution of non-zero synaptic weights in the weight matrix shown in (B). (D) PC raster plot on top and PC population rate at the bottom (see Figure 2 (A) from a simulation run with the weight matrix shown in (B)). (E) Posterior matrix of the decoded positions from spikes (see Figure 1 (E) within a selected high activity state (6th one from (D))). (F) Analysis of selected network dynamics indicators across different E-E weight scaling factors (0.8-1.2) as in Figure 3 (B).

242 strictly follow a lognormal distribution, although it has a similar long tail (Figure 6D2).  
 243 In order to establish whether the overall distribution or the fine structure of the weights  
 244 is the key determinant of neural dynamics in our model, we performed two more drastic  
 245 perturbations of the recurrent weight matrix itself, starting from the version established  
 246 in the learning phase.

247 Our first perturbation kept the structure of the interactions and the overall mean  
248 weight intact, but completely changed the distribution of the weights. This was achieved  
249 by binarizing the values of the learned weight matrix. Specifically, we divided weights  
250 into two groups, the strongest 3% and the remaining 97%, and set each weight in both  
251 groups to the group average (Figure 6A). Using the modified recurrent synapses between  
252 the PCs in the network, we observed extremely similar behaviour to our baseline network:  
253 sequence replays in both directions, always accompanied by ripple oscillation, with only  
254 a small change in the required multiplier for the PC-PC weights (Figure 6B, C).

255 The second modification kept the same overall weight distribution and even the ac-  
256 tual values of the outgoing weights for all neurons, but destroyed the global structure of  
257 synaptic interactions in the network. To this end, we randomly shuffled the identity of the  
258 postsynaptic neurons (by shuffling the columns of the weight matrix). Strong synapses  
259 were not clustered anymore along the diagonal (representing interactions between neurons  
260 with nearby place fields), but distributed homogeneously within the matrix (Figure 6D1).  
261 None of the networks equipped with the scaled versions of this shuffled weight matrix  
262 exhibited sequence replay, mean PC rates were severely reduced, and no sharp wave-like  
263 events were observed (Figure 6E, F). On the other hand, with sufficiently amplified (\*3.5)  
264 PC-PC weights we detected significant peaks in the ripple frequency range of the LFP  
265 (Figure 6F).

266 Taken together these modifications suggest that, unlike in the model of [Omura et al.](#)  
267 (2015), the distribution of the excitatory recurrent synaptic weights is neither necessary  
268 nor sufficient for the observed physiological population activity in our model. In other  
269 words, our simulation results suggest that the fine structure of recurrent excitation not  
270 only enables coding (sequence replay), but also has a major effect on the global average  
271 network dynamics (firing rates, sharp waves and ripple oscillations) in hippocampal area  
272 CA3.

### 273 **2.3.3 Cellular adaptation is necessary for replay**

274 As mentioned earlier, most previous models with symmetrical local excitatory interac-  
275 tions and global feedback inhibition functioned as “bump attractor” networks, in which  
276 the dynamics converge to stable patterns of activity involving high rates in a group of  
277 neurons with similar tuning properties (adjacent place fields), and suppressed firing in  
278 the rest of the excitatory population ([Zhang, 1996](#); [Samsonovich and McNaughton, 1997](#);  
279 [Káli and Dayan, 2000](#); [Compte et al., 2000](#)). Recent work with rate-based models has  
280 also shown that these “stable bumps” can be transformed into “traveling bumps” by the  
281 introduction of short-term depression ([York and van Rossum, 2009](#); [Romani and Tsodyks,](#)  
282 [2015](#); [Theodoni et al., 2018](#)) or spike threshold adaptation ([Itskov et al., 2011](#); [Azizi et al.,](#)  
283 [2013](#)). On the other hand, previous spiking models of sequence learning and recall/replay  
284 typically relied on temporally asymmetric learning rules and the resulting asymmetric  
285 weight matrices to ensure that neurons are reactivated in the same sequence as during  
286 learning ([Jahnke et al., 2015](#); [Chenkov et al., 2017](#)), which is also why it is difficult for  
287 these models to capture bidirectional replay. By contrast, our model uses the experimen-  
288 tally recorded symmetric STDP rule, which results in symmetrical synaptic interactions  
289 (although only at the population level rather than the single neuron level, due to the ran-  
290 domness of connectivity). Since our network generated a bump of activity that traveled  
291 unidirectionally in any given replay event rather than a “stable bump”, we hypothesized



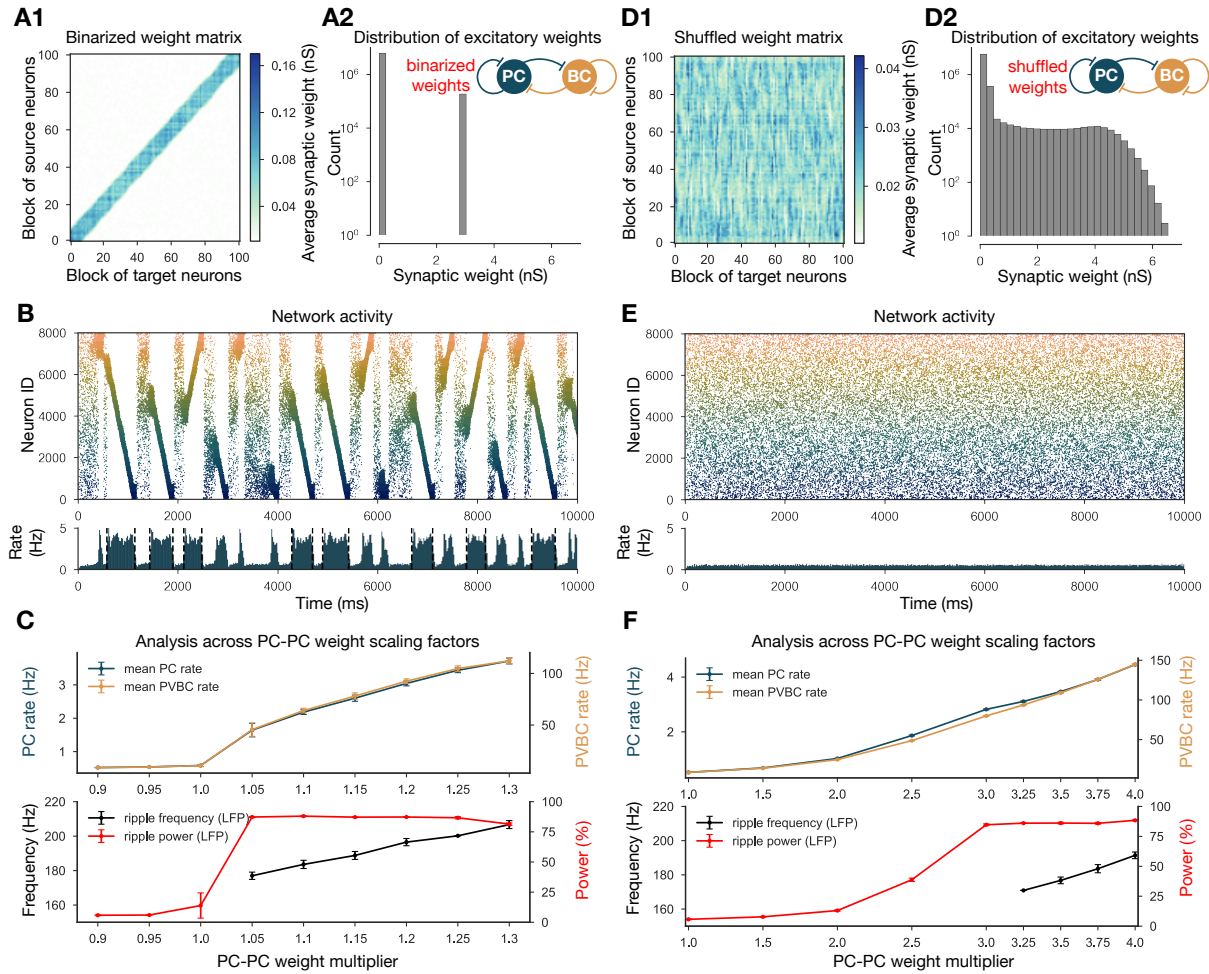

**Figure 6: Altering the structure of recurrent excitatory interactions changes the network dynamics but altering the weight statistics has little effect.** (A1) Binarized (largest 3% and remaining 97% non-zero weights averaged separately) recurrent excitatory weight matrix. (Derived from the baseline one shown in Figure 1 (C).) (A2) Distribution of non-zero synaptic weights in the learned weight matrix shown in (A1). (B) PC raster plot on top and PC population rate at the bottom (see Figure 2A) from a simulation ran with 1.1\* the binarized weight matrix shown in (A). (C) Analysis of selected network dynamics indicators across different E-E weight scaling factors (0.9-1.3) as in Figure 3 (B). (D1) Column-shuffled recurrent excitatory weight matrix. (Derived from the baseline one shown in Figure 1 (C).) (D2) Distribution of non-zero synaptic weights in the weight matrix shown in (D1) (identical to the distribution of the baseline weight matrix shown in Figure 1 (C)). (E) PC raster plot on top and PC population rate at the bottom from a simulation run with the shuffled weight matrix shown in (D1). (F) Analysis of selected network dynamics indicators across different E-E weight scaling factors (1.0-4.0) as in Figure 3 (B). Note the significantly extended horizontal scale compared to other cases.

292 that the cellular-level adaptation that characterized CA3 PCs and was also captured by  
 293 our model may destabilize stable bumps and lead to their constant movement.

294 To test this hypothesis, we re-fitted our single-cell data on PC responses to current  
 295 injections using a modified ExpIF model which did not contain any adaptation mech-  
 296 anism (but was otherwise similar to the baseline model). Although the non-adapting  
 297 ExpIF model provided a reasonably good fit to our single-cell data (Figure 7A), and the

298 weights resulting from learning were identical to the baseline case, the spontaneous net-  
299 work dynamics was completely different: there was no sequence replay for any scaling of  
300 the recurrent PC-PC weights; instead, when structured activity emerged from the random  
301 background, it was in the form of a stationary rather than a moving bump (Figure 7B).  
302 Therefore, it was the combination of a symmetric learning rule with cellular adaptation  
303 that created the possibility of bidirectional replay in our network model.

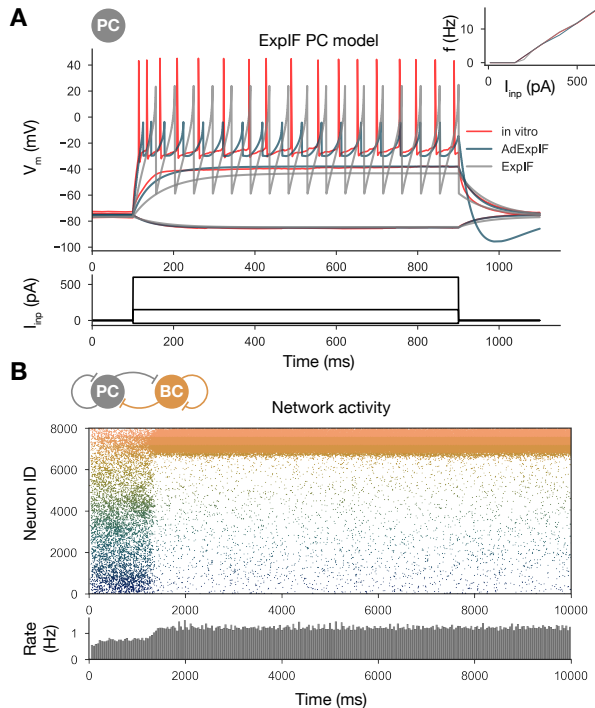

**Figure 7: Sequential replay requires firing rate adaptation in the PC population.** (A) Voltage traces of fitted AdExpIF (blue) and ExpIF (gray) PC models and experimental traces (red) are shown in the top panel. Inserts show the fI curves of the *in vitro* (red) and *in silico* cells. The amplitudes of the 800 ms long step current injections shown at the bottom were as follows: -0.04, 0.15 and 0.6 nA. For parameters of the cell models see Table 2. (B) PC raster plot of a 10-second long simulation with the ExpIF PC models, showing stationary activity in the top panel. PC population rate is shown below.

#### 304 2.3.4 Ripple oscillations are generated by the recurrently coupled inhibitory 305 population

306 From the weight matrix modifications, we also learned that ripple oscillations can be dis-  
307 entangled from sequence replays, and only require sufficient drive to the interconnected  
308 PVBC population in our model (Figure 6F). The same conclusion was reached by re-  
309 cent experimental studies *in vivo* (Stark et al., 2014) and *in vitro* (Ellender et al., 2010;  
310 Schlinghoff et al., 2014). To further investigate the generation of ripples in our model, we  
311 simulated and analyzed two additional modified versions of the full network.

312 First, we disconnected the PVBC network from the PCs and replaced the PC input  
313 with independent Poisson synaptic input at rates derived from the firing of the PC pop-  
314 ulation during SWRs in the full simulation (Figure 8A, B). In this simplified, recurrently



315 connected, purely PVBC network we systematically scanned different values of PC input  
316 rate and PC-PVBC synaptic weight and measured ripple power as well as the frequency  
317 of any significant ripple oscillation as in the full network before (Figure 8A, B). We found  
318 that ripple oscillations emerged when the net excitatory drive to PVBCs (which is pro-  
319 portional to the product of the incoming weight and the presynaptic firing rate) was  
320 sufficiently large. Above this threshold, the properties of the oscillation depended only  
321 mildly on the strength of the input (e.g., the frequency of the oscillation increased mod-  
322 erately with increasing drive), and the firing of PVBCs was synchronized mainly by the  
323 decay of inhibitory synaptic current evoked by shared input from their peers.

324 Several experiments have shown that local application of GABA blockers eliminates  
325 ripples (Maier et al., 2003; Ellender et al., 2010; Schlingloff et al., 2014; Stark et al.,  
326 2014); however, in an experimental setup it is hard to distinguish feedback inhibition  
327 (PVBC-PC) from reciprocal inhibition (PVBC-PVBC). As a final perturbation, we mod-  
328 ified the full baseline model by eliminating only the recurrent inhibitory synapses (Figure  
329 8C, D). The resulting dynamics were stable and with enhanced (\*1.3) PC-PC weights it  
330 also displayed sequence replay, but ripple oscillations were never observed (Figure 8D).  
331 Taken together, these results support the conclusions of previous modeling (Brunel and  
332 Wang, 2003; Geisler et al., 2005; Taxidis et al., 2012; Donoso et al., 2018; Ramirez-Villegas  
333 et al., 2018) as well as experimental studies (Buzsáki et al., 1992; Ylinen et al., 1995; Racz  
334 et al., 2009; Ellender et al., 2010; Schlingloff et al., 2014; Stark et al., 2014; Gulyás and  
335 Freund, 2015; Gan et al., 2017) proposing that ripple oscillations are generated in strongly  
336 driven, recurrently connected inhibitory networks by the fast inhibitory neuronal oscilla-  
337 tion (FINO) mechanism. In fact, recurrent inhibitory connections were both necessary  
338 and sufficient for the generation of ripple oscillations in our model.

### 339 3 Discussion

340 Using a data-driven network model of area CA3 of the hippocampus which reproduces the  
341 main characteristics of SWRs, we examined the link between learning during exploration  
342 and the network dynamics in resting periods. Our principal findings from analyzing and  
343 manipulating this model are as follows: (1) structured (learned) recurrent excitation in  
344 the CA3 region not only enables coding and memory, but is critical for the generation  
345 of SWRs as well; (2) the symmetric STDP rule described by Mishra et al. (2016), in  
346 combination with cellular adaptation in CA3 PCs, provides an explanation for the co-  
347 existence of forward and reverse replays; (3) the pattern of strong connections in the  
348 network rather than the overall weight statistics may be critical for the emergence and  
349 key properties of SWRs and replay in area CA3; (4) ripple oscillations are generated in  
350 the strongly driven, recurrently connected network of fast-spiking PVBCs by the FINO  
351 mechanism (Schlingloff et al., 2014) (also known as PYR-INT-INT (Stark et al., 2014;  
352 Buzsáki, 2015; Ramirez-Villegas et al., 2018)).

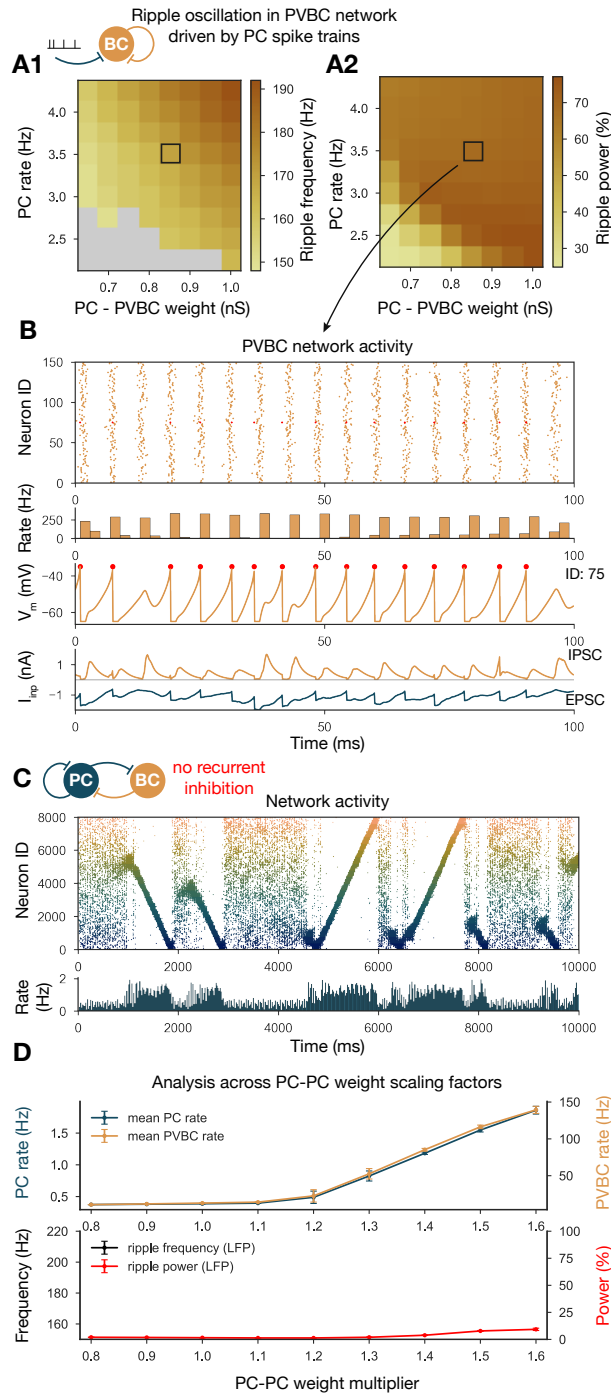

**Figure 8: Generation of ripple oscillations relies on recurrent connections within the PVBC population.** (A) Significant ripple frequency (A1) and ripple power (A2) of a purely PVBC network, driven by (independent) spike trains mimicking PC population activity. Gray color in (A1) means no significant ripple peak. (B) From top to bottom: Raster plot, mean PVBC rate, voltage trace (of a selected cell), EPSCs and IPSCs of the selected cell from the middle (100 ms long window) of a simulation used for (A). Ripple frequency and power corresponding to this simulation are marked with a black rectangle in (A1) and (A2). (C) PC raster plot on top and PC population rate at the bottom from a simulation ran with a network without any PVBC-PVBC synapses featuring stochastic forward and backward replays but no ripple oscillation (see below). (D) Analysis of selected network dynamics indicators across different E-E weight scaling factors (0.8-1.6) as in Figure 3 (B).

### 3.1 Connections of sharp waves, sequence replay and ripple oscillations

SWRs represent the most synchronous physiological activity pattern with the largest excitatory gain in the mammalian brain (Buzsáki et al., 1983, 1992; Buzsáki, 1989, 2015). Under normal conditions, ripples are typically observed riding on top of naturally emerging sharp waves. More recently, using optogenetics, Schlinghoff et al. (2014) and Stark et al. (2014) managed to decouple ripples from sharp waves by directly activating the interconnected network of PVBCs. Our *in silico* results perfectly parallel this work: without drastic, non-physiological modifications of the model ripples were always tied to sequence replay, which was in turn associated with bouts of increased spiking activity in the network (the sharp waves). When we separated the BC network, we found that a relatively high ( $> 2$  Hz) mean firing rate in the PC population was required for inducing ripple oscillation, a condition that was satisfied only during sharp wave events and the associated sequence replay in our full baseline network. When the PC population reaches this frequency after a stochastically initiated buildup period, the strongly driven, high-frequency firing of PVBCs is synchronized and phase-locked via reciprocal inhibition. Thus, the learned recurrent PC-PC synaptic weights are responsible for coding, govern sequence replay and, by giving rise to high PC activity during the replay, they also cause the ripples. In summary, memory storage and recall, as well as the main hippocampal oscillations and transient activity patterns, are intimately interconnected in our unifying model.

### 3.2 Biological plausibility of the model

The network model presented here was constrained strongly by the available experimental data. Many cellular and synaptic parameters were fit directly to *in vitro* measurements, and most functional parameters correspond to *in vivo* recordings of hippocampal place cells. Nevertheless, there are certainly many biological features that are currently missing from our model. We do not see this as a major limitation of our study, as our goal was to provide a mechanistic explanation for a core set of phenomena by identifying the key underlying biological components and interactions. On the other hand, our model can be systematically refined and extended, especially when new experimental data become available.

The main assumptions we made when constructing the model are explicitly stated in Table 1. Here we briefly discuss some of these assumptions, as well as some remaining discrepancies between our simulation results and the corresponding experimental data.

The 10% PC-PC connection probability is based on the classical viewpoint that considers the CA3 region as a highly interconnected network (Lisman, 1999; Andersen et al., 2007). Although a recent physiological study Guzman et al. (2016) estimated  $< 1\%$  connection probability in 400  $\mu\text{m}$  thick slices, the authors concluded from “virtual slicing” experiments that recurrent axons were substantially reduced. This is in agreement with Li et al. (1994), who reported at least 70% axonal loss in 400  $\mu\text{m}$  slices. Thus, the *in vivo* connection probability is likely to be considerably higher than 1%.

Our model network contained 8000 PCs and 150 PVBCs, which is rather small compared to the full rodent CA3 region. While *in vitro* studies suggest that this network size is sufficient for the generation of SWRs, and that these two cell types are the key

397 players in this process (Hájos et al., 2013; Schlingloff et al., 2014), it is likely that the  
398 much larger network size and the various additional cell types modify the quantitative  
399 aspects of SWRs *in vivo*.

400 One substantial difference between SWRs in the model and those recorded *in vivo* is  
401 the duration of the SWR events and the associated replay. Ripple episodes typically last  
402 40-100 ms *in vivo* (O’Keefe and Nadel, 1978; Buzsáki et al., 1983, 1992; Ylinen et al., 1995),  
403 although Fernández-Ruiz et al. (2019) recently showed that learning in spatial memory  
404 tasks is associated with prolonged SWRs and replays. In our model, SWRs can be up to  
405 800 ms in duration as they are terminated when the replayed sequence reaches either the  
406 end or the beginning of the learned trajectory (depending on the direction of replay), thus  
407 the length of the track determines the maximal duration of the SWR, in combination with  
408 the speed of replay (i.e., the rate at which activation propagates across the population of  
409 place cells). The speed of replay in the model is consistent with experimental findings, but  
410 a single replay event can cover the whole 3m-long track. Davidson et al. (2009) also used  
411 a long track in their experiments; however, they reported that the whole path was never  
412 replayed during a single SWR, only short segments, which combined to cover the whole  
413 track over multiple SWRs. Therefore, it appears likely that our simplified model lacks  
414 some additional mechanisms that contribute to the termination of individual SWRs in the  
415 experiments. For example, building on the work of York and van Rossum (2009), some  
416 rate-based models of sequence replay in a circular environment (Romani and Tsodyks,  
417 2015; Theodoni et al., 2018) included short-term synaptic depression as a mechanism  
418 for terminating replay. However, Guzman et al. (2016) found pseudo-linear short-term  
419 plasticity profiles for the recurrent PC-PC connections at physiological temperatures (al-  
420 though depression was present in recordings at room temperature). Moreover, PCs in our  
421 simulations typically fired single spikes at relatively low rates rather than bursts during  
422 SWRs (which is similar to the *in vitro* observations of Schlingloff et al. (2014) but in con-  
423 trast to the *in vivo* results of (Mizuseki and Buzsáki, 2013)), which rules out short-term  
424 synaptic plasticity as a key termination mechanism in our model. Another possibility is  
425 that an additional cell type that is not currently included in our model is responsible for  
426 the termination of SWR events. This explanation was supported by some exploratory  
427 simulations where we found that the duration of SWRs could be controlled by a second  
428 type of interneuron that provided delayed, long-lasting feedback inhibition to the PCs in  
429 the model.

### 430 **3.3 Previous models of sharp wave-ripples and sequence replay**

431 In this study, our main objective was to build a simplified, yet powerful model of area  
432 CA3 that is strongly constrained by experimental data at all levels, and thus allows  
433 us to uncover the mechanistic links between learning, neural population dynamics, and  
434 the representation of spatial (or other) sequences in the hippocampus during different  
435 behavioral states. Although there is a plethora of hippocampal models that shed light on  
436 some of these aspects (these models have been recently reviewed (Buzsáki, 2015; Jahnke  
437 et al., 2015) and are also cited when relevant throughout the Results section), there are  
438 only a handful of recent models that attempted to treat all of them within a single coherent  
439 framework.

440 The study of [Jahnke et al. \(2015\)](#) is probably the most similar in spirit to ours, as  
441 it also explores the relationship between learning, replay, and SWRs. One distinguishing  
442 feature of their model is that it relies on the nonlinear amplification of synaptic inputs  
443 by dendritic spikes in CA3 PCs for the generation of both sequential activity and ripple  
444 oscillations ([Memmesheimer, 2010](#)). Importantly, replay always occurs in the forward  
445 direction in their model, as it relies on feed-forward chains of strong weights in the network,  
446 established by an asymmetric STDP rule that is quite distinct from the one that was later  
447 found empirically by [Mishra et al. \(2016\)](#). In addition, the generation of ripple oscillations  
448 in their model relies on synchronized pulses of activity generated by interconnected PCs,  
449 while recent experimental findings appear to provide causal evidence for the involvement of  
450 fast-spiking PVBCs in ripple frequency oscillation generation ([Racz et al., 2009](#); [Ellender  
451 et al., 2010](#); [English et al., 2014](#); [Schlingloff et al., 2014](#); [Stark et al., 2014](#); [Gulyás and  
452 Freund, 2015](#); [Buzsáki, 2015](#); [Gan et al., 2017](#)). Finally, SWRs need to be evoked by  
453 synchronous external input in the model of [Jahnke et al. \(2015\)](#), while they can also  
454 emerge spontaneously in our model.

455 [Malerba and Bazhenov \(2019\)](#) developed a combined model of areas CA3 and CA1  
456 to study the generation of sharp waves in CA3 and associated ripple oscillations in CA1.  
457 This model relies on distance-dependent connection probabilities in the network for the  
458 generation of spatially localized SWR events. The study shows that modifying the recur-  
459 rent excitatory weights via an asymmetric STDP rule during a simulated learning epoch  
460 biases the content of SWRs towards the (forward) reactivation of learned trajectories.  
461 Ripple oscillations are modeled only in CA1 and, in contrast to our model (and the mod-  
462 els of [Taxidis et al. \(2012\)](#); [Donoso et al. \(2018\)](#); [Ramirez-Villegas et al. \(2018\)](#)), their  
463 generation is independent of recurrent inhibition.

464 A notable recent example of functionally motivated (top-down) modeling of these  
465 phenomena is the study of [Nicola and Clopath \(2019\)](#). The authors designed and trained  
466 (using supervised learning methods) a network of spiking neurons to generate activity  
467 sequences that were either tied to the population-level theta oscillation, or occurred spon-  
468 taneously in isolation (in a compressed manner), depending on the presence or absence  
469 of an external theta-frequency input. Interestingly, these results were achieved by tuning  
470 specifically the inhibitory weights in the network, while all other models (including ours)  
471 rely on plasticity in the recurrent excitatory synapses. Their model produced forward  
472 replay of sequences by default; however, sequences could be reversed by the activation of  
473 a distinct, dedicated class of interneurons.

474 To our best knowledge, ours is the first model that autonomously generates SWRs  
475 and replay in a spiking network model using synaptic weights established via the exper-  
476 imentally observed symmetric STDP rule. The model of [Haga and Fukai \(2018\)](#) used  
477 symmetric STDP (in combination with short-term plasticity) to modify an existing (pre-  
478 wired) weight structure, and showed that these changes biased evoked activity sequences  
479 towards reverse replay. Neither spontaneous sharp-waves nor ripple oscillations were ob-  
480 served in this model.

481 We believe that our approach of fitting the parameters of our single cell models directly  
482 to experimental data to mimic the physiological spiking behavior of real PCs and PVBCs is  
483 also quite unique. This enabled our models of PCs to capture spike frequency adaptation,  
484 which proved to be essential for the generation of propagating activity (sequence replay)  
485 despite the essentially symmetric nature of synaptic interactions.



486 At a more general level, our study strongly suggests that the complex structure of  
487 synaptic interactions in neuronal networks, whether it results from learning or develop-  
488 mental processes, may have a hitherto unappreciated degree of control over the general  
489 mode of activity in the network, and should be taken into account by future theories and  
490 models of population activity patterns in any part of the nervous system.

## 491 4 Methods

492 In order to investigate the mechanisms underlying hippocampal network dynamics and  
493 how these are affected by learning, we built a simplified network model of area CA3. This  
494 scaled-down version of CA3 contained 8000 PCs and 150 PVBCs, which is approximately  
495 equivalent to cell numbers in area CA3 in a 600  $\mu\text{m}$  thick hippocampal slice based on our  
496 previous estimates (Schlingloff et al., 2014), which are also in good agreement with other  
497 estimates (Bezaire and Soltesz, 2013; Donoso et al., 2018). The connection probability  
498 was estimated to be 25% for PVBCs (Schlingloff et al., 2014) and 10% for PCs (Table  
499 3), and was independent of distance in the model. Half of the PCs were assumed to have  
500 place fields on the simulated 3 m long linear track.

501 Only PCs received external input; during exploration, they were activated directly to  
502 model place-associated firing; otherwise, they received synaptic input (through the mossy  
503 fibers) in the form of uncorrelated Poisson spike trains with a mean rate of 15 Hz. As the  
504 hallmark of granule cell activity in the dentate gyrus is sparse, low frequency firing (Jung  
505 and McNaughton, 1993; Skaggs et al., 1996), and each CA3 PC is contacted by only a  
506 few mossy fibers, the physiological mean rate of mossy fiber input to PCs is probably  
507 substantially lower (especially in off-line states of the hippocampus). On the other hand,  
508 real CA3 PCs also receive direct input from the entorhinal cortex, and also spontaneous  
509 EPSPs from a large population of recurrent collateral synapses. Overall, these other  
510 numerous, but small-amplitude inputs may be responsible for most of the depolarization  
511 required to bring CA3 PCs close to their firing threshold, in which case mossy fiber  
512 input at a significantly lower rate would be sufficient to evoke the same number of action  
513 potentials in CA3 PCs.

514 Network simulations were run in Brian2 (Stimberg et al., 2019). Learning of the  
515 structure of recurrent excitation, single cell and network optimization, and the analysis  
516 of the network simulations are detailed in the following sections. A comprehensive list of  
517 assumptions made during the model building process is presented in Table 1.

### 518 4.1 Spike trains during exploration

519 Spike trains mimicking CA3 PC activity during exploration were generated with expo-  
520 nentially distributed inter spike intervals (ISIs) with mean  $1/\lambda$ , giving rise to Poisson  
521 processes. Spike trains of non-place cells had mean firing rates of  $\lambda = 0.1$  Hz. For the  
522 spike trains of the randomly selected 4000 place cells, homogeneous Poisson processes with  
523  $\lambda = 20$  Hz were generated, and spike times were accept-reject sampled with acceptance  
524 probability coming from place cell-like tuning curves (eq. (2)), which led to inhomoge-  
525 neous Poisson processes with time-dependent rate  $\lambda(t)$ . Tuning curves were modeled as  
526 Gaussians centered at randomly distributed positions and standard deviation set to cover  
527 10% of the 3 m long linear track (eq. (1)). Edges of the place fields were defined where

**Table 1:** List of modeling assumptions.

- 
- 1 In the absence of unified data sets, it was assumed that published parameters from different animals (mouse/rat, strain, sex, age) can be used together to build a general model.
  - 2 Connection probabilities were assumed to depend only on the presynaptic cell type and to be independent of distance.
  - 3 Each PC was assumed to have a place field in any given environment with a probability of 50%. For simplicity, multiple place fields were not allowed.
  - 4 When constructing the "teaching spike trains" during simulated exploration, place fields were assumed to have a uniform size, tuning curve shape and maximum firing rate.
  - 5 It was assumed that deterministic synapses without short- or long-term plasticity during network simulations can capture the relevant behaviour of the modeled CA3 synapses.
  - 6 When considering the non-specific drive to the network in the off-line state, it was assumed that the external input can be modeled as uncorrelated random spike trains (one per cell) activating strong synapses (representing the mossy fibers) in the PC population.
  - 7 Some fundamental assumptions are inherited from common practices in computational neuroscience; these include modeling spike trains as Poisson processes, capturing weight changes with additive STDP, describing cells with single compartmental AdExpIF models, modeling a neuronal population with replicas of a single model and representing synapses with conductance-based models with bi-exponential kinetics.
  - 8 When comparing our model to *in vivo* data, an implicit assumption was that the behaviour of a simplified model based on slice constraints can generalize to the observed behaviour of the full CA3 region *in vivo*, in the context of studying the link between activity-dependent plasticity and network dynamics.
- 

528 the firing rate dropped to 10% of the maximal 20 Hz (Dragoi and Buzsáki, 2006). Tuning  
 529 curves were also modulated by the background  $f_\theta = 7$  Hz theta activity, phase precessed  
 530 up to  $180^\circ$  at the beginning of the place field (O'Keefe and Recce, 1993). The firing rate  
 531 of the  $i$ th place cell was calculated as follows:

$$\tau_i(x) = \exp\left(\frac{-(x - m_i^{PF})^2}{2\sigma^2}\right) \quad (1)$$

532

$$\lambda_i(t) = \tau_i(x(t)) \times \cos\left(2\pi f_\theta t - \frac{l^{tr}/2}{l^{PF}}(x(t) - s_i^{PF})\right) \times \lambda_{max} \quad (2)$$

533 where  $\tau_i(x)$  is the spatial tuning curve of the  $i$ th neuron,  $x(t)$  is the position of the  
 534 animal,  $m_i^{PF}$ ,  $l^{PF} = 0.3$  m and  $s_i^{PF}$  are the middle, length and start of the given place  
 535 field respectively, while  $l^{tr} = 3$  m is the length of the linear track;  $\lambda_{max} = 20Hz$  is the  
 536 maximum in-field firing rate.

537 Spikes within a 5 ms refractory period of the previous spike were always rejected. The  
 538 speed of the animal was set to 32.5 cm/s, thus each run took  $\sim 9.2$  s, after which the

539 animal was immediately “teleported back” to the start of the linear track. Generated spike  
540 trains were 400 s long, leading to  $\sim 43$  repetitions on the same linear track.

## 541 4.2 Learning via STDP

STDP was implemented by an additive pair-based learning rule, evaluated at spike arrivals (Kempster et al., 1999; Gerstner et al., 2014). Synaptic weights evolved as follows:

$$\Delta w_+ = A_+ \exp\left(-\frac{\Delta t}{\tau_+}\right) \text{ at } t_{post} \text{ if } t_{pre} < t_{post} \quad (3)$$

$$\Delta w_- = A_- \exp\left(\frac{\Delta t}{\tau_-}\right) \text{ at } t_{pre} \text{ if } t_{pre} > t_{post} \quad (4)$$

542 where  $\Delta t = t_{post} - t_{pre}$  is the time difference between action potentials,  $A_{\pm}$  describe the  
543 weight update, which decayed exponentially with time constants  $\tau_{\pm}$ . Synaptic weights  
544 were cropped at  $w_{max} = 20$  nS. To reproduce the broad STDP curve presented in Mishra  
545 et al. (2016)  $\tau_{\pm} = 62.5$  ms was used. In the classical asymmetric STDP rules  $A_+$  is positive,  
546 while  $A_-$  is negative; here, both of them were set to 80 pA to obtain a symmetric STDP  
547 curve (Mishra et al., 2016). In simulations using the asymmetric STDP rule,  $\tau_{\pm} = 20$  ms,  
548  $A_+ = 400$  pA,  $A_- = -400$  pA, and  $w_{max} = 40$  nS were used. In both cases PCs were  
549 sparsely connected (Table 3) and weights were initialized to 0.1 nS. In the learning phase  
550 the intrinsic dynamics of the PCs were not modeled explicitly, since only the timing of  
551 their spikes mattered, which was set directly as described above. No self-connections were  
552 allowed, and diagonal elements of the learned recurrent weight matrix were always set to  
553 zero after any modification.

## 554 4.3 In vitro electrophysiology

555 Somatic whole-cell patch-clamp recordings were performed in acute hippocampal slices as  
556 described before (Papp et al., 2013; Schlingloff et al., 2014; Kohus et al., 2016). Pyramidal  
557 cells were recorded in the CA3 pyramidal cell layer of juvenile control mice, while PVBCs  
558 were recorded in a targeted manner in transgenic mice that expressed enhanced green  
559 fluorescent protein controlled by the parvalbumin promoter (BAC-PV-eGFP) (Meyer  
560 et al., 2002). To characterize the physiological response properties of the neurons, hy-  
561 perpolarizing and depolarizing current steps of various amplitudes were injected into the  
562 soma, and the voltage response of the cell was recorded. Injected current pulses had a  
563 duration of 800 ms, and amplitudes between -100 and 600 pA. Experimental traces were  
564 corrected for the theoretical liquid junction potential before further use.

## 565 4.4 Single cell models

566 Neurons were modeled with the AdExpIF model (Naud et al., 2008; Gerstner et al., 2014).  
567 AdExpIF neurons are described by their membrane potential  $V(t)$  and the adaptation  
568 variable  $w(t)$ , which obey:

$$C_m \frac{dV_m(t)}{dt} = -\left(g_L(V(t) - V_{rest}) - g_L \Delta T \exp\left(\frac{V(t) - \vartheta}{\Delta T}\right) + I_{syn}(t) + w(t)\right) \quad (5)$$

569

$$\tau_w \frac{dw(t)}{dt} = a(V(t) - V_{rest}) - w(t) \quad (6)$$

570 where  $C_m$  is the membrane capacitance,  $g_L$  is the leak conductance,  $V_{rest}$  is the reversal  
 571 potential of the linear leak current (which is approximately equal to the resting potential),  
 572  $\vartheta$  is the intrinsic spike threshold,  $\Delta T$  characterizes the “sharpness” of the threshold,  $w(t)$   
 573 is the adaptation current and  $I_{syn}$  is the synaptic current (see below). When  $V(t)$  crosses  
 574 the firing threshold  $\theta$ , it is reset to  $V_{reset}$  and remains there for a refractory period  $t_{ref}$ .  
 575 The adaptation current is also increased by a factor  $b$  at each spike arrival and decays ex-  
 576 ponentially afterwards with the time constant  $\tau_w$ . The parameter  $a$  describes the strength  
 577 of sub-threshold adaptation.

578 To investigate the role of adaptation, an ExpIF PC model was also fit to the data. The  
 579 ExpIF model is the same as eq. (5) without the  $w(t)$  adaptation current (implemented  
 580 as an AdExpIF model with parameters  $a$  and  $b$  set identically to zero). The parameters  
 581 of all models were fit to experimental data from our somatic whole-cell recordings, and  
 582 the voltage responses to current injections of four different amplitudes (including two  
 583 subthreshold and two suprathreshold stimuli) were used in each case. Parameters were  
 584 tuned using the `Optimizer` package (Friedrich et al., 2014) with the NEST simulator as  
 585 backend (Gewaltig and Diesmann, 2007). Spike count, ISI distribution, latency to first  
 586 spike and mean squared error (excluding spikes) were used as equally weighted features.  
 587 After comparing different optimization techniques, the final parameters presented here  
 588 were obtained with an evolutionary algorithm implemented by the `inspyred` package  
 589 (Garrett, 2012), running for 100 generations with a population size of 100. The parameters  
 which yield the best models for the CA3 populations are summarized in Table 2.

**Table 2:** Optimized parameters of PC (AdExpIF and ExpIF) and PVBC models. Physical dimensions are as follows:  $C_m$ : pF,  $g_L$  and  $a$ : nS,  $V_{rest}$ ,  $\Delta T$ ,  $\vartheta$ ,  $\theta$  and  $V_{reset}$ : mV,  $t_{ref}$  and  $\tau_w$ : ms,  $b$ : pA.

|             | $C_m$  | $g_L$ | $V_{rest}$ | $\Delta T$ | $\vartheta$ | $\theta$ | $V_{reset}$ | $t_{ref}$ | $\tau_w$ | $a$   | $b$    |
|-------------|--------|-------|------------|------------|-------------|----------|-------------|-----------|----------|-------|--------|
| <b>PC</b>   | 180.13 | 4.31  | -75.19     | 4.23       | -24.42      | -3.25    | -29.74      | 5.96      | 84.93    | -0.27 | 206.84 |
| <b>PC</b>   | 344.18 | 4.88  | -75.19     | 10.78      | -28.77      | 25.13    | -58.82      | 1.07      | -        | -     | -      |
| <b>PVBC</b> | 118.52 | 7.51  | -74.74     | 4.58       | -57.71      | -34.78   | -64.99      | 1.15      | 178.58   | 3.05  | 0.91   |

590

## 591 4.5 Synapse models

592 Synapses were modeled as conductances with bi-exponential kinetics:

$$g(t) = \hat{g}A \left( \exp\left(-\frac{t}{\tau_d}\right) - \exp\left(-\frac{t}{\tau_r}\right) \right) \quad (7)$$

593 where  $\hat{g}$  is the peak conductance (which will also be referred to as the synaptic weight)  
 594 and  $\tau_r$  and  $\tau_d$  are rise and decay time constants respectively. The normalization constant  
 595  $A = \exp\left(-\frac{t_p}{\tau_d}\right) - \exp\left(-\frac{t_p}{\tau_r}\right)$  was chosen such that the synapses reach their peak conductance  
 596 at  $t_p = \tau_d \tau_r / (\tau_d - \tau_r) \log(\tau_d / \tau_r)$  ms. Kinetic parameters were taken from the literature  
 597 (Geiger et al., 1997; Bartos et al., 2002; Lee et al., 2014; Vyleta et al., 2016; Guzman

598 et al., 2016) and are summarized in Table 3. The postsynaptic current contained AMPA  
 599 receptor- and GABA-A receptor-mediated components, and was computed as:

$$I_{syn}(t) = g_{AMPA}(t)(V(t) - E_{exc}) + g_{GABA}(t)(V(t) - E_{inh}) \quad (8)$$

600 where  $E_{exc} = 0$  mV and  $E_{inh} = -70$  mV are the reversal potentials of excitatory and inhibitory currents, respectively.

**Table 3:** Synaptic parameters (taken from the literature or optimized). Physical dimensions are as follows:  $\hat{g}$ : nS,  $\tau_r$ ,  $\tau_d$  and  $t_d$  (synaptic delay): ms and connection probability  $p_{conn}$  is dimensionless. GC stands for the granule cells of the dentate gyrus. (GC  $\rightarrow$  PC synapses are referred as mossy fibers.)

|                         | $\hat{g}$ |       | $\tau_r$ | $\tau_d$ | $t_d$ | $p_{conn}$ |
|-------------------------|-----------|-------|----------|----------|-------|------------|
|                         | sym.      | asym. |          |          |       |            |
| PC $\rightarrow$ PC     | 0.1-6.3   | 0-15  | 1.3      | 9.5      | 2.2   | 0.1        |
| PC $\rightarrow$ PVBC   | 0.85      |       | 1        | 4.1      | 0.9   | 0.1        |
| PVBC $\rightarrow$ PC   | 0.65      |       | 0.3      | 3.3      | 1.1   | 0.25       |
| PVBC $\rightarrow$ PVBC | 5         |       | 0.25     | 1.2      | 0.6   | 0.25       |
| GC $\rightarrow$ PC     | 19.15     | 21.5  | 0.65     | 5.4      | -     | -          |

601

## 602 4.6 Network optimization

603 Synaptic weights of the network (5 parameters in total) were optimized with an evolu-  
 604 tionary algorithm using a custom written evaluator in BluePyOpt (Van Geit et al., 2016).  
 605 The multi-objective fitness function  $\mathcal{F}$ , designed for this network included 6 separately  
 606 weighted features (eq. (9)): physiological PC firing rate, no significant gamma oscillation  
 607 in the PC population, significant ripple frequency oscillations in the rates of PC and  
 608 PVBC populations as well as high ripple vs. gamma power in the rates of the PC and  
 609 PVBC populations:

$$\mathcal{F} = \left[ \exp\left(-\frac{(\nu_{PC} - 2)^2}{2 \times 0.5^2}\right), \delta(f_{\gamma PVBC}), \exp\left(-\frac{(f_{rPC} - 180)^2}{2 \times 20^2}\right), \right. \\ \left. 2 \times \exp\left(-\frac{(f_{rPVBC} - 180)^2}{2 \times 20^2}\right), 5 \times \frac{\sum P(\omega_r PC)}{\sum P(\omega_\gamma PC)}, 10 \times \frac{\sum P(\omega_r PVBC)}{\sum P(\omega_\gamma PVBC)} \right] \quad (9)$$

610 where  $\nu$  is the firing rate,  $\delta$  is the Dirac-delta function,  $f_r$  and  $f_\gamma$  are significant peaks  
 611 in the ripple and gamma range (see below) of the PSD of the firing rate respectively  
 612 and  $P(\omega_r)$  and  $P(\omega_\gamma)$  are the periodogram values within the gamma and ripple bands  
 613 of the firing rate respectively, while the sum of them represents the power within the  
 614 frequency bands (as below). As in the case of the network simulations (see above) if the  
 615 PC firing rate exceeded the 2 Hz high activity state detection threshold spectral features  
 616 were only extracted in these time windows. Sequence replay was not analysed during  
 617 the optimization. Optimizations were run with 50 offspring for 10 generations. Synaptic  
 618 weights were varied in the [0.1, 5] nS range, except the “detonator” mossy fiber ones  
 619 which were given a higher [15, 30] nS range (Henze et al., 2002; Vyleta et al., 2016). For



620 the learned recurrent excitatory weights an additional scaling factor was introduced. All  
621 learned weights are presented with this optimized scale factor (0.62 for symmetric and  
622 1.27 for asymmetric STDP rule) taken into account. Final weights are presented in Table  
623 3. The ExpIF PC model required much higher synaptic drive to fire at the same frequency  
624 as the AdExpIF model, thus the mossy fiber input weight was doubled (38.3 nS) when  
625 ExpIF PC models were used.

## 626 4.7 LFP estimate

627 An estimate of the LFP was calculated by summing the synaptic currents of a small  
628 randomly selected subset of  $N = 400$  PCs (Mazzoni et al., 2008). This approach is  
629 essentially equivalent to using “transmembrane” currents to calculate the field potential  
630 at an arbitrary sampling point  $x_e$ , using volume conduction theory and the forward model  
631 (Einevoll et al., 2013):

$$V(x_e, t) = \frac{1}{4\pi\sigma} \sum_{n=1}^N \frac{I_n(t)}{|x_e - x_n|} \quad (10)$$

632 where  $\sigma = 1/3.54$  S/m is the extracellular conductivity and  $I_n(t)$  denotes the trans-  
633 membrane currents of the  $n$ th neuron. There was no attempt to replicate the spatial  
634 organization of CA3 PCs and a uniform  $|x_e - x_n| = 1\mu\text{m}$  distance from the sampling  
635 point was used (note that this choice affects the results only as a constant scaling factor).  
636 The resulting signal was low pass filtered at 500 Hz with a 3rd order Butterworth filter.

## 637 4.8 Spectral analysis

638 Power spectral density (PSD) was estimated by Welch’s method with a Hanning window,  
639 using 512 long segments in case of population rates (sampling frequency = 1 kHz) and 4096  
640 long segments for LFP (see below, sampling frequency = 10 kHz) with 0.5 overlap. If the  
641 network showed multiple sequence replays during the 10-seconds long simulations (most  
642 cases) only the detected high activity states (see above) were analysed and averaged, to  
643 get rid of the high power at  $\sim 1.5$  Hz, signaling the frequency of sequence replays. In this  
644 case shorter segments (256 and 2048 respectively) were used to estimate the PSD. The  
645 significance of peaks in the power spectra in the gamma (30-100 Hz) and ripple (150-220  
646 Hz) bands was evaluated using Fisher’s g-statistic (Fisher, 1929) defined as:

$$g = \frac{\max_k(P(\omega_k))}{\sum_{k=1}^N P(\omega_k)} \quad (11)$$

647 where  $P(\omega)$  is the periodogram (Welch’s method estimates PSD by averaging periodograms  
648 from the short segments) evaluated at  $k$  discrete frequencies,  $N$  is the length of the  
649 periodogram and  $\sum_{k=1}^N P(\omega_k)$  is the total power of the spectrum. The distribution of  
650 g-statistics under the null hypothesis ( $H_0$ ) (Gaussian white noise) is given by:

$$p = Pr(g^* > g) = \sum_{k=1}^b (-1)^{k-1} \frac{N!}{k!(N-k)!} (1 - kg)^{N-1} \quad (12)$$

651 where  $b$  is the largest integer less than  $1/g$ . Large value of  $g$  (small p-value) indicates a  
652 strong periodic component and leads to the rejection of  $H_0$ . Alpha level 0.05 was used

653 throughout the study. To characterize non-significant oscillations too, gamma and ripple  
654 power (defined as the sum in the given frequency band divided by the total power in the  
655 0-500 Hz range) were calculated as well. Time-frequency representations were created by  
656 convolving the firing rates (or LFP) with samples of the integral of the Morlet wavelet  
657  $\Psi(t) = \exp^{-t^2/2} \cos(5t)$  evaluated at the scales corresponding to the 25-325 Hz band, using  
658 the `pywt` package (Lee et al., 2006).

## 659 4.9 Replay analysis

660 Sequence replay was analysed with methods used by experimentalists having access to  
661 spike times of hundreds of identified neurons (Ólafsdóttir et al., 2018). Firstly, candidate  
662 replay events were selected based on the averaged (into 20 ms bins) PC population firing  
663 rate crossing the threshold of 2 Hz for at least 260 ms. Secondly, the animal’s position  
664 was estimated with a memoryless Bayesian place decoder based on the observed spikes  
665 within the selected time windows (Davidson et al., 2009; Karlsson and Frank, 2009). Only  
666 spikes from the  $N = 4000$  place cells were used. For numerical stability log likelihoods  
667 were calculated:

$$\log(\text{Pr}(\text{spikes}|x)) = \sum_{i=1}^N n_i \log\left(\frac{\Delta T \tau_i(x)}{n_i!}\right) - \Delta T \sum_{i=1}^N \tau_i(x) \quad (13)$$

668 where  $n_i$  is the number of spikes of the  $i$ th neuron within the  $\Delta T = 10$  ms long, non-  
669 overlapping time bins and  $\tau_i(x)$  is the tuning curve used for spike train generation (eq.  
670 (1)). The 3 m long linear track was binned into 50 intervals, resulting in 6 cm spatial  
671 resolution. Thirdly, constant velocity  $v$  neural trajectories were detected with a 2D band  
672 finding method in the decoded posterior matrix (Davidson et al., 2009). For candidate  
673 events consisting of  $n$  time bins, the average likelihood  $R$  that the animal is within distance  
674  $d = 18$  cm of a particular trajectory is given by:

$$R(v, x_0) = \frac{1}{n} \sum_{k=0}^{n-1} \text{Pr}(|x - (x_0 + v_k \Delta T)| \leq d) \quad (14)$$

675 where  $x_0$  is the starting position of the trajectory.  $R(v, x_0)$  was maximized using an  
676 exhaustive search to test all combinations of  $v$  between -18 m/s and 18 m/s in 0.3 m/s  
677 increments (excluding slow trajectories with speed  $\in [-0.3, 0.3]$  m/s) and  $x_0$  between -1.5  
678 m and 4.5 m in 3 cm increments. Lastly, to determine the significance of replay,  $R_{max}$  was  
679 compared to the best line fits of 100 posterior probability matrices generated by shuffling  
680 the identities of cells included in the candidate event. Only events with  $R_{max}$  values  
681 exceeding the 95th percentile of their own shuffled distribution were labeled as replay.

682 To replicate the step-size analysis of Pfeiffer and Foster (2015) the position of the animal  
683 was estimated as a weighted average based on the posterior matrix in each time bin  
684 instead of the band finding method. As their control distribution for the skewed step-sizes  
685 (“predicted step-size” distribution) was derived for a 2D arena, it was not directly applic-  
686 able to our linear track setup. Therefore, we defined the predicted step-size distribution  
687 based on the ratio of the length of the replayed path and the duration of the replay event  
688 for the SWRs detected in the simulations.

## 689 Accessibility

690 The source code is publicly available at <https://github.com/KaliLab/ca3net>.

## 691 Acknowledgements

692 We thank G. Buzsáki, D. Csordás, G. Nyíri, B. Ujfalussy, and V. Varga for insightful comments on the  
693 manuscript, Marcel Stimberg for his help with Brian2, and F. Cramer for “scientific” colormaps.

## 694 Funding

695 Supported by OTKA (K83251, K85659, K115441), Hungarian Brain Research Program Grant 2017-1.2.1-  
696 NKP-2017-00002 (to N.H.), ERC 2011 ADG 294313 (SERRACO), EU FP7 grant no. 604102 (Human  
697 Brain Project), Horizon 2020 grants no. 720270 and 785907 (HBP SGA1 and SGA2), and the Ministry  
698 of Innovation and Technology NRDI Office within the framework of the Artificial Intelligence National  
699 Laboratory Program.

## 700 Author contribution

701 S.K., A.G. and T.F. conceptualized the study. S.K. supervised the study. M.R.K., O.I.P., N.H., and A.G.  
702 provided experimental data. A.E., E.V., O.N. and S.K. worked on spike train generation and learning.  
703 B.B. and S.K. optimized single cell models. A.E., B.B., E.V. and S.K. built and optimized the network  
704 and analysed the results. A.E., I.M. and S.K. designed and implemented weight matrix modifications.  
705 A.E. created all figures. A.E. and S.K. wrote the manuscript with inputs from all authors.

## 706 Conflict of interest

707 The authors declare that the research was conducted in the absence of any commercial or financial  
708 relationships that could be construed as a potential conflict of interest.

## References

- Andersen, P., Morris, R., Amaral, D., Bliss, T., and O’Keefe, J. (2007). *The Hippocampus Book*. Oxford University Press, Oxford.
- Azizi, A. H., Wiskott, L., and Cheng, S. (2013). A computational model for preplay in the hippocampus. *Frontiers in Computational Neuroscience*, 7(161).
- Bartos, M., Vida, I., Frotscher, M., Meyer, A., Monyer, H., Geiger, J. R. P., and Jonas, P. (2002). Fast synaptic inhibition promotes synchronized gamma oscillations in hippocampal interneuron networks. *PNAS*, 99(20):13222–13227.
- Bezaire, M. J. and Soltesz, I. (2013). Quantitative assessment of CA1 local circuits: Knowledge base for interneuron-pyramidal cell connectivity. *Hippocampus*, 23(9):751–785.
- Bi, G.-q. and Poo, M.-m. (1998). Synaptic Modifications in Cultured Hippocampal Neurons: Dependence on Spike Timing, Synaptic Strength, and Postsynaptic Cell Type Guo-qiang. *The Journal of Neuroscience*, 18(24):10464–10472.
- Brunel, N. and Wang, X.-J. (2003). What determines the frequency of fast network oscillations with irregular neural discharges? I. Synaptic dynamics and excitation-inhibition balance. *Journal of Neurophysiology*, 90:415–430.

- Buzsáki, G. (1986). Hippocampal Sharp Waves: Their Origin and Significance. *Brain Research*, 398:242–252.
- Buzsáki, G. (1989). Two-stage model of memory trace formation: A role for "noisy" brain states. *Neuroscience*, 31(3):551–570.
- Buzsáki, G. (2015). Hippocampal sharp wave-ripple: A cognitive biomarker for episodic memory and planning. *Hippocampus*, 25(10):1073–1188.
- Buzsáki, G., Horváth, Z., Urioste, R., Hetke, J., and Wilse, K. (1992). High-frequency network oscillation in the hippocampus. *Science*, 256(5059):1025–1027.
- Buzsáki, G., Lai-Wo S., L., and Vanderwolf, C. H. (1983). Cellular bases of hippocampal EEG in the behaving rat. *Brain Research Reviews*, 6:139–171.
- Carr, M. F., Jadhav, S. P., and Frank, L. M. (2011). Hippocampal replay in the awake state: A potential substrate for memory consolidation and retrieval. *Nature Neuroscience*, 14(2):147–153.
- Chenkov, N., Sprekeler, H., and Kempster, R. (2017). Memory replay in balanced recurrent networks. *PLoS Computational Biology*, 13(1):e1005359.
- Colgin, L. L. (2016). Rhythms of the hippocampal network. *Nature Reviews Neuroscience*, 17(4):239–249.
- Compte, A., Brunel, N., Goldman-Rakic, P. S., and Wang, X.-J. (2000). Synaptic Mechanisms and Network Dynamics Underlying Spatial Working Memory in a Cortical Network Model. *Cerebral Cortex*, 10(9):910–923.
- Csicsvari, J., O'Neill, J., Allen, K., and Senior, T. (2007). Place-selective firing contributes to the reverse-order reactivation of CA1 pyramidal cells during sharp waves in open-field exploration. *European Journal of Neuroscience*, 26(3):704–716.
- Davidson, T. J., Kloosterman, F., and Wilson, M. A. (2009). Hippocampal Replay of Extended Experience. *Neuron*, 63:497–507.
- Davoudi, H. and Foster, D. J. (2019). Acute silencing of hippocampal CA3 reveals a dominant role in place field responses. *Nature Neuroscience*, 22(3):337–342.
- Diba, K. and Buzsáki, G. (2007). Forward and reverse hippocampal place-cell sequences during ripples. *Nature Neuroscience*, 10(10):1241–1242.
- Donoso, J. R., Schmitz, D., Maier, N., and Kempster, R. (2018). Hippocampal Ripple Oscillations and Inhibition-First Network Models: Frequency Dynamics and Response to GABA Modulators. *The Journal of Neuroscience*, 38(12):3124–3146.
- Dragoi, G. and Buzsáki, G. (2006). Temporal Encoding of Place Sequences by Hippocampal Cell Assemblies. *Neuron*, 50(1):145–157.
- Ego-Stengel, V. and Wilson, M. A. (2010). Disruption of ripple-associated hippocampal activity during rest impairs spatial learning in the rat. *Hippocampus*, 20(1).
- Einevoll, G. T., Kayser, C., Logothetis, N. K., and Panzeri, S. (2013). Modelling and analysis of local field potentials for studying the function of cortical circuits. *Nature Reviews Neuroscience*, 14(11):770–785.
- Ellender, T. J., Nissen, W., Mann, E. O., Colgin, L. L., and Paulsen, O. (2010). Priming of Hippocampal Population Bursts by Individual Perisomatic-Targeting Interneurons. *Journal of Neuroscience*, 30(17):5979–5991.
- English, D. F., Peyrache, A., Stark, E., Roux, L., Vallentin, D., Long, M. A., and Buzsáki, G. (2014). Excitation and inhibition compete to control spiking during hippocampal ripples: Intracellular study in behaving mice. *Journal of Neuroscience*, 34(49):16509–16517.

- Fernández-Ruiz, A., Oliva, A., de Oliveira, E. F., Rocha-Almeida, F., Tingley, D., and Buzsáki, G. (2019). Long-duration hippocampal sharp wave ripples improve memory. *Science*, 364(6445):1082–1086.
- Fisher, R. A. (1929). Tests of significance in harmonic analysis. *Proceedings of the Royal Society of London A*, 125(796):54–59.
- Foster, D. J. (2017). Replay Comes of Age. *Annual Review of Neuroscience*, 40:581–602.
- Foster, D. J. and Wilson, M. A. (2006). Reverse replay of behavioural sequences in hippocampal place cells during the awake state. *Nature*, 440(7084):680–683.
- Foster, D. J. and Wilson, M. A. (2007). Hippocampal Theta Sequences. *Hippocampus*, 17:1093–1099.
- Friedrich, P., Vella, M., Gulyás, A. I., Freund, T. F., and Káli, S. (2014). A flexible, interactive software tool for fitting the parameters of neuronal models. *Frontiers in Neuroinformatics*, 8(61).
- Gan, J., ming Weng, S., Pernía-Andrade, A. J., Csicsvari, J., and Jonas, P. (2017). Phase-Locked Inhibition, but Not Excitation, Underlies Hippocampal Ripple Oscillations in Awake Mice In Vivo. *Neuron*, 93(2):308–314.
- Garrett, A. (2012). inspyred, Inspired Intelligence.
- Geiger, J. R. P., Lübke, J., Roth, A., Frotscher, M., and Jonas, P. (1997). Submillisecond AMPA receptor-mediated signaling at a principal neuron- interneuron synapse. *Neuron*, 18(6):1009–1023.
- Geisler, C., Brunel, N., and Wang, X.-J. (2005). Contributions of intrinsic membrane dynamics to fast network oscillations with irregular neuronal discharges. *Journal of Neurophysiology*, 94:4344–4361.
- Gerstner, W., Kistler, W. M., Naud, R., and Paninski, L. (2014). *Neuronal Dynamics: From Single Neurons to Networks and Models of Cognition*. Cambridge University Press.
- Gewaltig, M.-O. and Diesmann, M. (2007). NEST:NEuronal Simulation Tool. *Scholarpedia*, 2(1430).
- Girardeau, G., Benchenane, K., Wiener, S. I., Buzsáki, G., and Zugaro, M. B. (2009). Selective suppression of hippocampal ripples impairs spatial memory. *Nature Neuroscience*, 12(10):1222–1223.
- Gulyás, A. I. and Freund, T. T. (2015). Generation of physiological and pathological high frequency oscillations: The role of perisomatic inhibition in sharp-wave ripple and interictal spike generation. *Current Opinion in Neurobiology*, 31:26–32.
- Gupta, A. S., van der Meer, M. A., Touretzky, D. S., and Redish, A. D. (2010). Hippocampal Replay Is Not a Simple Function of Experience. *Neuron*, 65(5):695–705.
- Guzman, S. J., Schlögl, A., Frotscher, M., and Jonas, P. (2016). Synaptic mechanisms of pattern completion in the hippocampal CA3 network. *Science*, 335(6304):11117–11123.
- Haga, T. and Fukai, T. (2018). Recurrent network model for learning goal-directed sequences through reverse replay. *eLife*, 7:e34171.
- Hájos, N., Karlócai, M. R., Németh, B., Ulbert, I., Monyer, H., Szabó, G., Erdélyi, F., Freund, T. F., and Gulyás, A. I. (2013). Input-Output Features of Anatomically Identified CA3 Neurons during Hippocampal Sharp Wave/Ripple Oscillation In Vitro. *Journal of Neuroscience*, 33(28):11677–11691.
- Henze, D. A., Wittner, L., and Buzsáki, G. (2002). Single granule cells reliably discharge targets in the hippocampal CA3 network in vivo. *Nature Neuroscience*, 5(8):790–795.
- Hulse, B. K., Moreaux, L. C., Lubenov, E. V., and Siapas, A. G. (2016). Membrane Potential Dynamics of CA1 Pyramidal Neurons during Hippocampal Ripples in Awake Mice Article Membrane Potential Dynamics of CA1 Pyramidal Neurons during Hippocampal Ripples in Awake Mice. *Neuron*, 89(4):800–813.



- Itskov, V., Curto, C., Pastalkova, E., and Buzsáki, G. (2011). Cell assembly sequences arising from spike threshold adaptation keep track of time in the hippocampus. *Journal of Neuroscience*, 31(8):2828–2834.
- Jadhav, S. P., Kemere, C., German, P. W., and Frank, L. M. (2012). Awake Hippocampal Sharp-Wave Ripples Support Spatial Memory. *Science*, 336(6087):1454–1458.
- Jahnke, S., Timme, M., and Memmesheimer, R.-M. (2015). A Unified Dynamic Model for Learning, Replay, and Sharp-Wave/Ripples. *The Journal of Neuroscience*, 35(49):16236–58.
- Jensen, O. and Lisman, J. E. (2005). Hippocampal sequence-encoding driven by a cortical multi-item working memory buffer. *Trends in Neurosciences*, 28(2):67–72.
- Jung, M. W. and McNaughton, B. L. (1993). Spatial selectivity of unit activity in the hippocampal granular layer. *Hippocampus*, 3(2):165–182.
- Káli, S. and Dayan, P. (2000). The involvement of recurrent connections in area CA3 in establishing the properties of place fields: A model. *Journal of Neuroscience*, 20(19):7463–7477.
- Karlsson, M. P. and Frank, L. M. (2009). Awake replay of remote experiences in the hippocampus. *Nature Neuroscience*, 12(7):913–918.
- Kempter, R., Gerstner, W., and van Hemmen, J. L. (1999). Hebbian learning and spiking neurons. *Physical Review*, 59(4):4498–4514.
- Kohus, Z., Káli, S., Schlingloff, D., Papp, O., Rovira-Esteban, L., Freund, T. F., Hájos, N., and Gulyás, A. I. (2016). Properties and dynamics of inhibitory synaptic communication within the CA3 microcircuits of pyramidal cells and interneurons expressing parvalbumin or cholecystokinin. *The Journal of physiology*, 594(13):3745–74.
- Kudrimoti, H. S., Barnes, C. A., and McNaughton, B. L. (1999). Reactivation of Hippocampal Cell Assemblies: Effects of Behavioral State, Experience, and EEG Dynamics. *The Journal of Neuroscience*, 19(10):4090–4101.
- Lee, A. K. and Wilson, M. A. (2002). Memory of sequential experience in the hippocampus during slow wave sleep. *Neuron*, 36(6):1183–1194.
- Lee, G., Wasilewski, F., R., G., Wohlfahrt, K., O’Leary, A., Nahrsteadt, H., et al. (2006). PyWavelets - Wavelet Transforms in Python. <https://github.com/PyWavelets/pywt>.
- Lee, S.-H., Marchionni, I., Bezaire, M., Varga, C., Danielson, N., Lovett-Barron, M., Losonczy, A., and Soltesz, I. (2014). Parvalbumin-Positive Basket Cells Differentiate among Hippocampal Pyramidal Cells. *Neuron*, 82(5):1129–1144.
- Levy, W. B. (1996). A sequence predicting CA3 is a flexible associator that learns and uses context to solve hippocampal-like tasks. *Hippocampus*, 6(6):579–590.
- Li, X., Somogyi, P., Ylinen, A., and Buzsáki, G. (1994). The hippocampal CA3 network: An in vivo intracellular labeling study. *Journal of Comparative Neurology*, 339(2):181–208.
- Lisman, J. E. (1999). Relating Hippocampal Circuitry Viewpoint to Function: Recall of Memory Sequences by Reciprocal Dentate–CA3 Interactions. *Neuron*, 22:233–242.
- Maier, N., Nimmrich, V., and Draguhn, A. (2003). Cellular and network mechanisms underlying spontaneous sharp wave-ripple complexes in mouse hippocampal slices. *Journal of Physiology*, 550(3):873–887.
- Malerba, P. and Bazhenov, M. (2019). Circuit mechanisms of hippocampal reactivation during sleep. *Neurobiology of Learning and Memory*, 160:98–107.
- Marr, D. (1971). Simple memory: a theory for archicortex. *Philosophical transactions of the Royal Society of London. Series B, Biological sciences*, 262(841):23–81.

- Mazzoni, A., Panzeri, S., Logothetis, N. K., and Brunel, N. (2008). Encoding of naturalistic stimuli by local field potential spectra in networks of excitatory and inhibitory neurons. *PLoS Computational Biology*, 4(12).
- McNaughton, B. L. and Morris, R. G. (1987). Hippocampal synaptic enhancement and information storage within a distributed memory system. *Trends in Neurosciences*, 10(10):408–415.
- Memmesheimer, R.-M. (2010). Quantitative prediction of intermittent high-frequency oscillations in neural networks with supralinear dendritic interactions. *PNAS*, 107(24):11092–11097.
- Meyer, A. H., Katona, I., Blatow, M., Rozov, A., and Monyer, H. (2002). In vivo labeling of parvalbumin-positive interneurons and analysis of electrical coupling in identified neurons. *Journal of Neuroscience*, 22(16):7055–7064.
- Mishra, R. K., Kim, S., Guzman, S. J., and Jonas, P. (2016). Symmetric spike timing-dependent plasticity at CA3-CA3 synapses optimizes storage and recall in autoassociative networks. *Nature communications*, 7(11552).
- Mizuseki, K. and Buzsáki, G. (2013). Preconfigured, skewed distribution of firing rates in the hippocampus and entorhinal cortex. *Cell Reports*, 4:1010–1021.
- Morris, R. G. M., Garrud, P., Rawlins, J. N. P., and O’Keefe, J. (1982). Place navigation impaired in rats with hippocampal lesion. *Nature*, 297:681–683.
- Nádasy, Z., Hirase, H., Czurkó, A., Csicsvari, J., and Buzsáki, G. (1999). Replay and time compression of recurring spike sequences in the hippocampus. *The Journal of neuroscience*, 19(21):9497–507.
- Naud, R., Marcille, N., Clopath, C., and Gerstner, W. (2008). Firing patterns in the adaptive exponential integrate-and-fire model. *Biological Cybernetics*, 99:335–347.
- Nicola, W. and Clopath, C. (2019). A diversity of interneurons and Hebbian plasticity facilitate rapid compressible learning in the hippocampus. *Nature Neuroscience*, 22(7):1168–1181.
- O’Keefe, J. and Dostrovsky, J. (1971). The hippocampus as a spatial map. Preliminary evidence from unit activity in the freely-moving rat. *Brain Research*, 34(1):171–175.
- O’Keefe, J. and Nadel, L. (1978). *The Hippocampus as a cognitive map*. Oxford University Press.
- O’Keefe, J. and Recce, M. L. (1993). Phase Relationship Between Hippocampal Place Units and the EEG Theta Rhythm. *Hippocampus*, 3(3):317–330.
- Ólafsdóttir, H. F., Bush, D., and Barry, C. (2018). The Role of Hippocampal Replay in Memory and Planning. *Current Biology*, 28:R37–R50.
- Oliva, A., Fernández-Ruiz, A., Leroy, F., and Siegelbaum, S. A. (2020). Hippocampal CA2 sharp-wave ripples reactivate and promote social memory. *Nature*, 587(7833):264–269.
- Omura, Y., Carvalho, X. M. M., Inokuchi, K., and Fukai, X. T. (2015). A Lognormal Recurrent Network Model for Burst Generation during Hippocampal Sharp Waves. *The Journal of Neuroscience*, 35(43):14585–14601.
- Papp, O. I., Karlócai, M. R., Tóth, I. E., Freund, T. F., and Hájos, N. (2013). Different input and output properties characterize parvalbumin-positive basket and Axo-axonic cells in the hippocampal CA3 subfield. *Hippocampus*, 23(10):903–918.
- Pfeiffer, B. E. (2017). The content of hippocampal "replay". *Hippocampus*.
- Pfeiffer, B. E. and Foster, D. J. (2013). Hippocampal place-cell sequences depict future paths to remembered goals. *Nature*, 497:74–81.

- Pfeiffer, B. E. and Foster, D. J. (2015). Autoassociative dynamics in the generation of sequences of hippocampal place cells. *Science*, 349(6244):180–184.
- Racz, A., Ponomarenko, A. A., Fuchs, E. C., and Monyer, H. (2009). Augmented Hippocampal Ripple Oscillations in Mice with Reduced Fast Excitation onto Parvalbumin-Positive Cells. *Journal of Neuroscience*, 29(8):2563–2568.
- Ramirez-Villegas, J. F., Willeke, K. F., Logothetis, N. K., and Besserve, M. (2018). Dissecting the Synapse- and Frequency-Dependent Network Mechanisms of In Vivo Hippocampal Sharp Wave-Ripples. *Neuron*, 100(5):1224–1240.
- Rolls, E. T. (1996). A theory of hippocampal function in memory. *Hippocampus*, 6(6):601–620.
- Romani, S. and Tsodyks, M. (2015). Short-term plasticity based network model of place cells dynamics. *Hippocampus*, 25(1):94–105.
- Samsonovich, A. and McNaughton, B. L. (1997). Path integration and cognitive mapping in a continuous attractor neural network model. *Journal of Neuroscience*, 17(15):5900–5920.
- Schlingloff, D., Káli, S., Freund, T. F., Hájos, N., and Gulyás, A. I. (2014). Mechanisms of Sharp Wave Initiation and Ripple Generation. *Journal of Neuroscience*, 34(34):11385–11398.
- Skaggs, W. E., McNaughton, B. L., Wilson, M. A., and Barnes, C. A. (1996). Theta Phase Precession in Hippocampal Neuronal Populations and the Compression of Temporal Sequences. *Hippocampus*, 6:149–172.
- Stark, E., Roux, L., Eichler, R., Senzai, Y., Royer, S., and Buzsáki, G. (2014). Pyramidal Cell-Interneuron Interactions Underlie Hippocampal Ripple Oscillations. *Neuron*, 83(2):467–480.
- Stimberg, M., Brette, R., and Goodman, D. F. (2019). Brian 2, an intuitive and efficient neural simulator. *eLife*, 8(e47314).
- Taxidis, J., Coombes, S., Mason, R., and Owen, M. R. (2012). Modeling Sharp Wave-Ripple Complexes Through a CA3-CA1 Network Model with Chemical Synapses. *Hippocampus*, 22:995–1017.
- Theodoni, P., Rovira, B., Wang, Y., and Roxin, A. (2018). Theta-modulation drives the emergence of connectivity patterns underlying replay in a network model of place cells. *eLife*, 7:e37388.
- Van Geit, W., Gevaert, M., Chindemi, G., Rössert, C., Courcol, J.-D., Muller, E., Schürmann, F., Segev, I., and Markram, H. (2016). BluePyOpt: Leveraging open source software and cloud infrastructure to optimise model parameters in neuroscience. *Frontiers in Neuroinformatics*, 10(17).
- Vyleta, N. P., Borges-Merjane, C., and Jonas, P. (2016). Plasticity-dependent, full detonation at hippocampal mossy fiber–CA3 pyramidal neuron synapses. *eLife*, 5:e17977.
- Wilson, M. A. and McNaughton, B. L. (1994). Reactivation of Hippocampal Ensemble Memories During Sleep. *Science*, 265(5172):676–679.
- Ylinen, A., Bragin, A., Nádasdy, Z., Jandó, G., Szabo, I., Sik, A., and Buzsáki, G. (1995). Sharp Wave-Associated High-Frequency Oscillation (200-Hz) in the Intact Hippocampus - Network and Intracellular Mechanisms. *The Journal of Neuroscience*, 15(1):30–46.
- York, L. C. and van Rossum, M. C. W. (2009). Recurrent networks with short term synaptic depression. *Journal of Computational Neuroscience*, 27(3):607–620.
- Zhang, K. (1996). Representation of spatial orientation by the intrinsic dynamics of the head-direction cell ensemble: A theory. *Journal of Neuroscience*, 16(6):2112–2126.

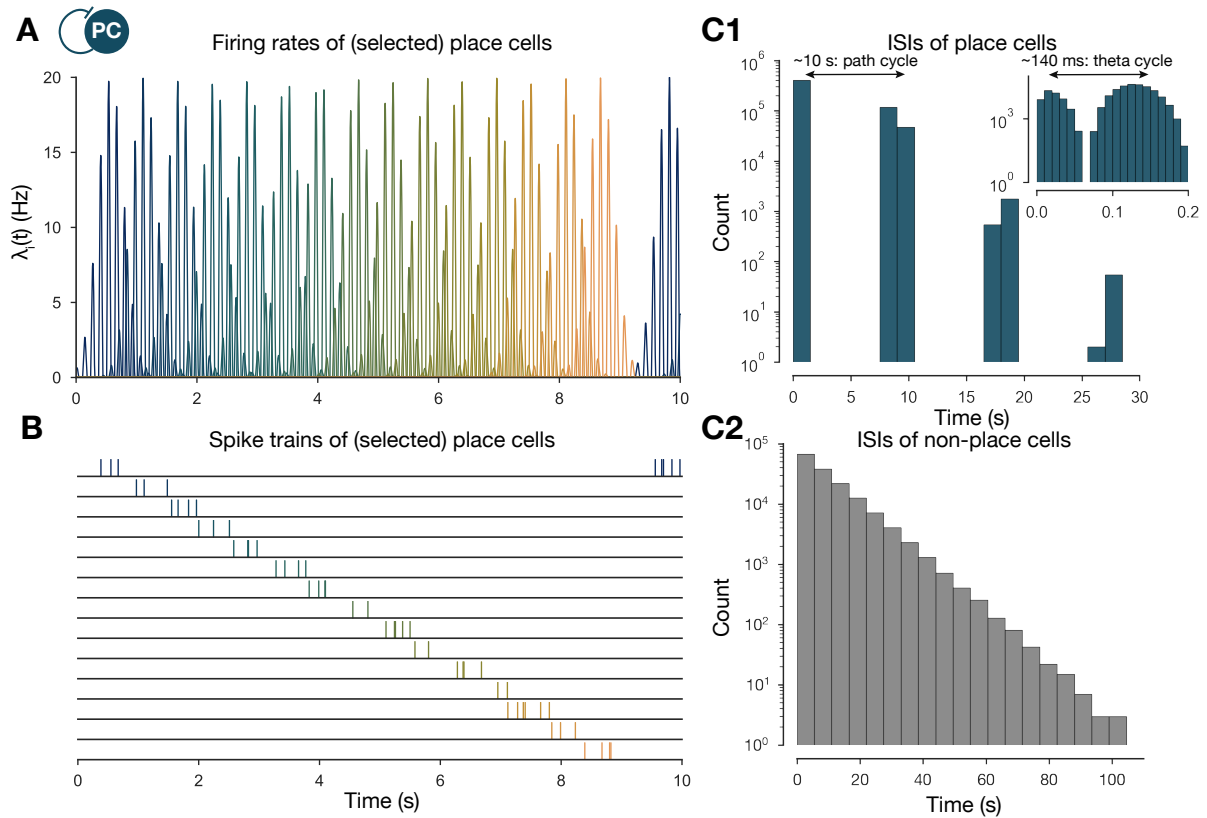

**Figure S1: The generation of the spike trains of PCs in the exploration phase. (A)** Firing rates of exemplar place cells covering the whole 3 m long linear track. Compared to the tuning curves shown in Figure 1 (A) (eq. (1)), these are time-dependent rates modulated by theta oscillation and phase precession (eq. (2)). **(B)** Exemplar spike trains generated based on the firing rates shown in (A). (Spike trains used in the learning phase were 400 second long. For the purpose of visualization, only the beginning is shown here.) **(C)** ISI distribution of the generated spike trains. ISIs of place cells (C1) (insert is a zoom into the same distribution at a finer timescale to show theta modulation) and non-place cells (C2).

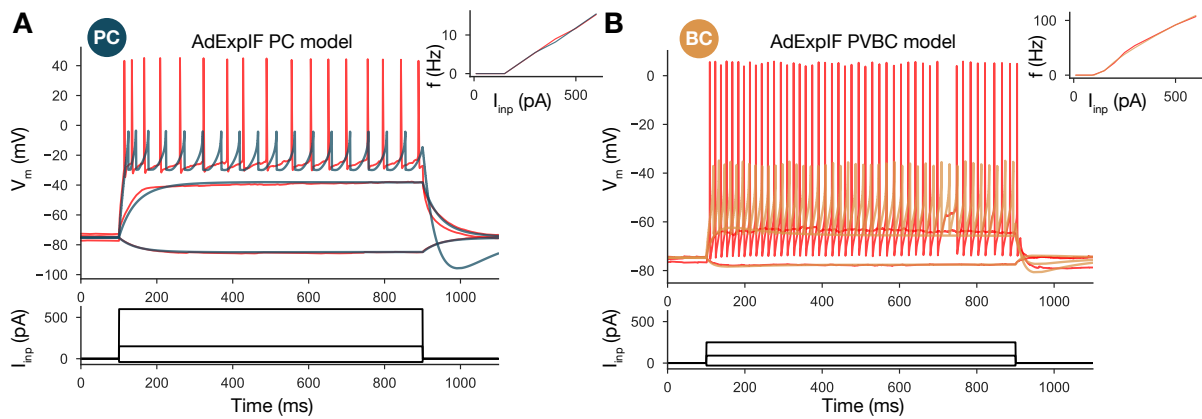

**Figure S2: Single cell models.** (A) Fitted AdExpIF PC model (blue) and experimental traces (red) are shown on the top panel. The 800 ms long step current injections shown in the bottom were as follows: -0.04, 0.15 and 0.6 nA. (B) Fitted ExpIF PVBC model (gold) and experimental traces (red) are shown in the top panel. The amplitudes of the 800 ms long step current injections shown at the bottom were as follows: -0.03, 0.09 and 0.25 nA. Inserts show the  $f$ - $I$  curve of the *in vitro* (red) and *in silico* cells. For parameters of the cell models see Table 2.



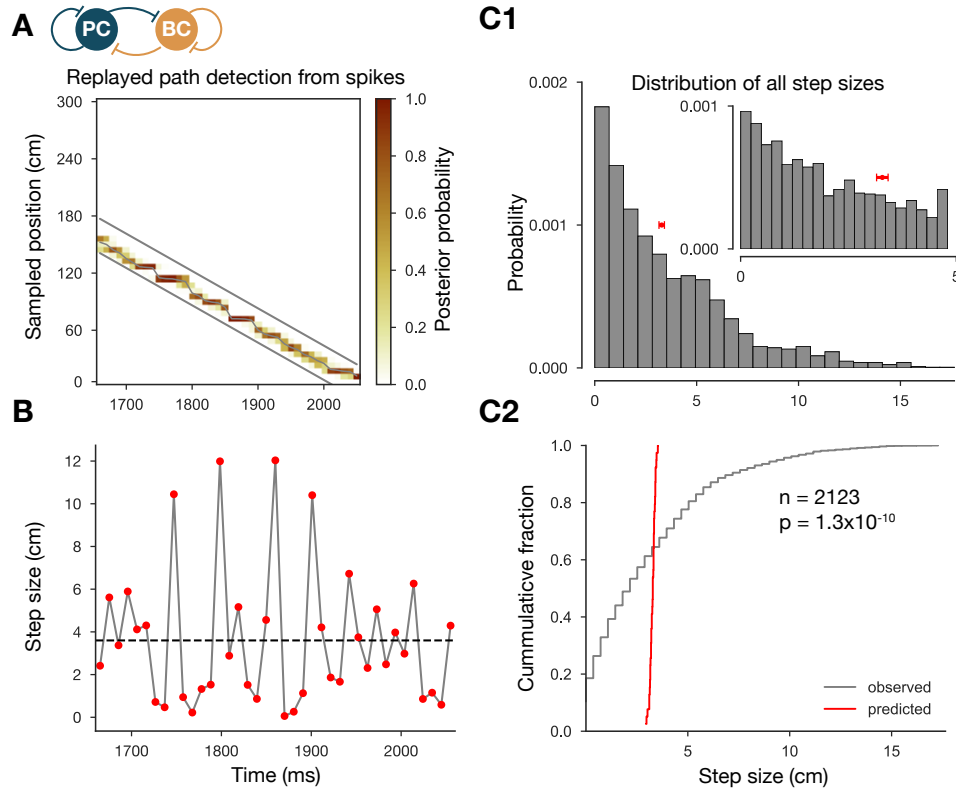

**Figure S3: The step-size distribution of the decoded paths is much wider than expected.** (A) Posterior matrix of the decoded positions from spikes within a selected high activity state (1st one from Figure 2 (A)). Thick gray lines indicate the edges of the decoded, constant velocity path. Thin gray line shows the decoded path by connecting the weighted average positions in every 10 ms long time step. (B) Step sizes from the decoded, variable velocity path (see (A)) for the same period (1st high activity state in Figure 2 (A)). The horizontal dashed black line shows the average or predicted step-size within the given period. (C1) Skewed distribution of observed step sizes (in gray) and the predicted (from evenly spacing) step-size distribution (in red) for more than a hundred replay events (similar to the one in (A) and (B)). Inset shows the same distributions at smaller scales. (C2) Cumulative distribution of the observed and predicted step sizes shown in (C1). Observed vs. predicted distributions significantly differ (two-sample Kolmogorov-Smirnov test).

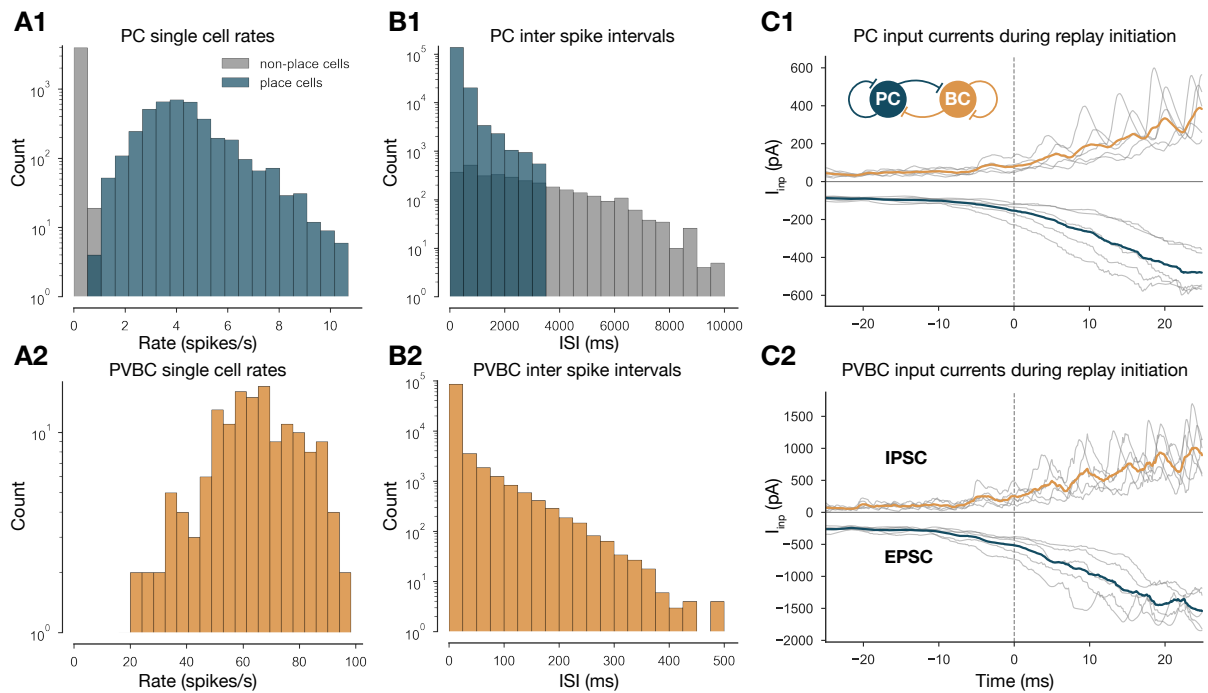

**Figure S4: Single cell characteristics during network simulations.** (A) Single cell PC (A1) and PVBC (A2) firing rates of the 10 second long simulation shown in Figure 2. (B) ISIs of PCs (B1) and PVBCs (B2) in the 10-second long simulation shown in Figure 2. (C) Synaptic input currents of PCs (C1) and PVBCs (C2) during sequence replay initiation. Gray lines are the averages of the EPSCs and IPSCs of 400 PCs and 30 PVBCs respectively. Individual gray lines correspond to individual high activity states ( $n=7$ , see Figure 2 (A)). Dashed vertical lines (at 0 ms) indicate the beginning of the periods marked as high activity states (see Figure 2 (A)). Colored lines represent the grand average EPSC (blue) and IPSC (gold) arriving at PCs (C1) and PVBCs (C2) during SWR initiation.

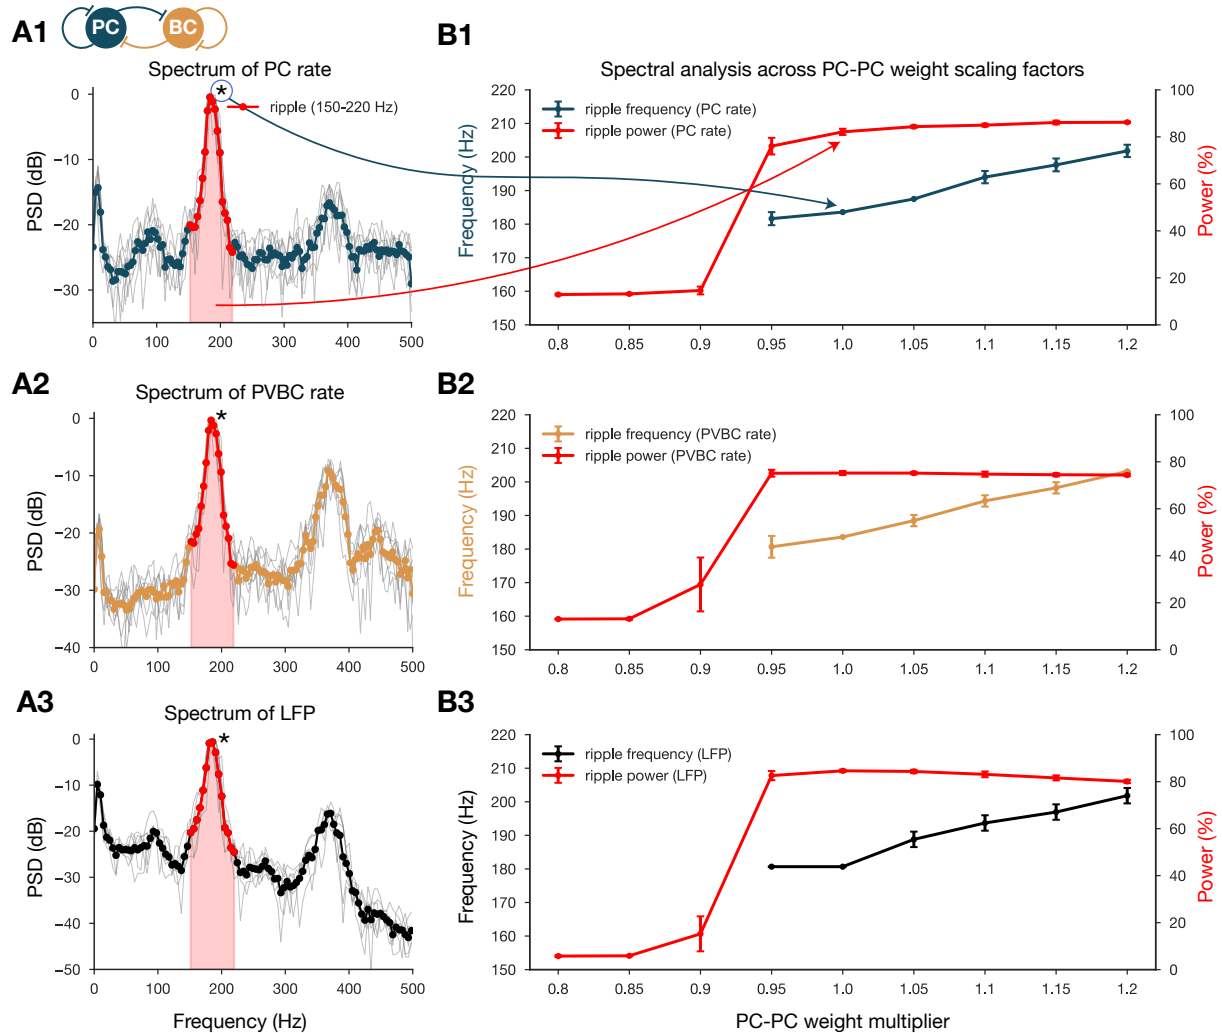

**Figure S5: Spectral analysis of network dynamics across different PC-PC weight scaling factors.** (A) PSDs of PC (A1) and PVBC (A2) population rates and estimated LFP (A3). Gray lines correspond to individual high activity states ( $n=14$ ) shown in Figure 2 (A), while the thicker colored lines are their averages. Ripple frequency range (150-220 Hz) is highlighted in red. Shaded red area below the curves indicates the power in the ripple range. (B) Spectral analysis of network dynamics across different E-E weight scaling factors (0.8-1.2). The frequency of significant ripple oscillation and ripple oscillation power (red) are shown for PC (B1) and PVBC (B2) population rates and estimated LFP (B3). (B3) is the same as the bottom panel of Figure 3 (B) and it is duplicated only to show how similar the curves are for the rates and the estimated LFP.
